# Supplementary material for: Impact of London's road traffic air and noise pollution on birth weight: retrospective population based cohort study
Source: PubMed Central journal article supplement (PMC5712860; doi:10.1136/bmj.j5299), 2017-12-05

**Smith RB, Fecht D, Gulliver J, Beevers SD, Dajnak D, Blangiardo M, Ghosh RE, Hansell AL, Kelly FJ, Anderson HR, Toledano MB. Impact of London's road traffic air and noise pollution on birth weight: a retrospective population-based cohort study.**

**Web appendix 1: Supplementary Material**

**Contents**

Supplementary Figure 1: The functional relationship between term birth weight and night-time ( $L_{\text{night}}$ ) and day-time ( $L_{\text{Aeq,16hr}}$ ) noise..... 3

Supplementary Figure 2: Mean difference in term birth weight (g), associated with IQR\* increases in air pollutants, in single- and two- air pollutant models..... 4

Supplementary Figure 3: Adjusted mean difference in term birth weight (g), associated with air pollutants (per IQR) and night-time noise ( $L_{\text{night}}$ ), in single-exposure and joint-exposure models ..... 6

Supplementary Figure 4: Adjusted mean difference in term birth weight (g), associated with air pollutants (per IQR) and day-time noise ( $L_{\text{Aeq,16hr}}$ ), in single-exposure and joint-exposure models..... 8

Supplementary Table 1: Air pollution and road traffic noise exposures in the study population (N=540,365) and their correlations..... 10

Supplementary Table 2: OR (95%CI) for term LBW and term SGA and mean difference (95% CI) in term birth weight (g) associated with potential confounding factors (univariate linear/logistic regression) in the study population (n=540,365) ..... 11

Supplementary Table 3: Mean difference (95% CI) in exposure metric associated with potential confounding factors (univariate linear regression) in the study population (n=540,365)..... 12

Supplementary Table 4: Odds of term LBW (<2500g and  $\geq 37$  weeks gestation) associated with air pollutants and noise (OR, 95% confidence intervals)..... 14

Supplementary Table 5: Odds of term small-for-gestational-age (SGA) associated with air pollutants and noise (odds ratios with 95% confidence intervals)..... 15

Supplementary Table 6: Mean difference in term birth weight (g) associated with air pollutants and noise (with 95% confidence intervals)..... 16

Supplementary Table 7: Joint air-pollutant-noise models: Mean difference (95% CI) in birth weight (g) associated with air pollutants and noise amongst term births ..... 17

Supplementary Table 8: Associations between noise on the continuous scale (per IQR) and odds of LBW and SGA and mean difference in birth weight (g) amongst term births, in unadjusted, adjusted and joint air pollutant-noise models..... 18

Supplementary Table 9: Joint air-pollutant-noise models: Adjusted OR (95%CI) for LBW and SGA, and mean difference (95% CI) in birth weight (g) associated with noise amongst term births, after adjustment for each air pollutant..... 21

Supplementary Table 10: Adjusted\* odds of term LBW and term SGA associated with trimester-specific air pollutant exposures (models adjusted for road traffic noise co-exposure)..... 25

Supplementary Table 11: Joint air-pollutant-noise models: Adjusted mean difference (95% CI) in birth weight (g) associated with air pollutants (per IQR) and noise amongst term births ..... 26

Supplementary Appendix 1 - Adjusted joint-exposure generalised additive models (GAMs)..... 27

**Supplementary Figure 1: The functional relationship between term birth weight and night-time ( $L_{\text{night}}$ ) and day-time ( $L_{\text{Aeq,16hr}}$ ) noise**

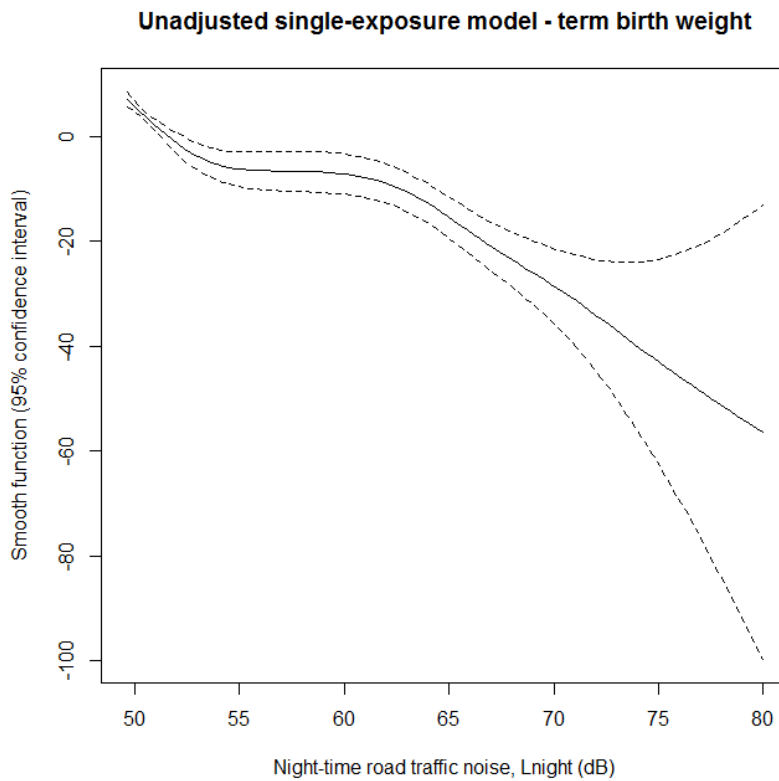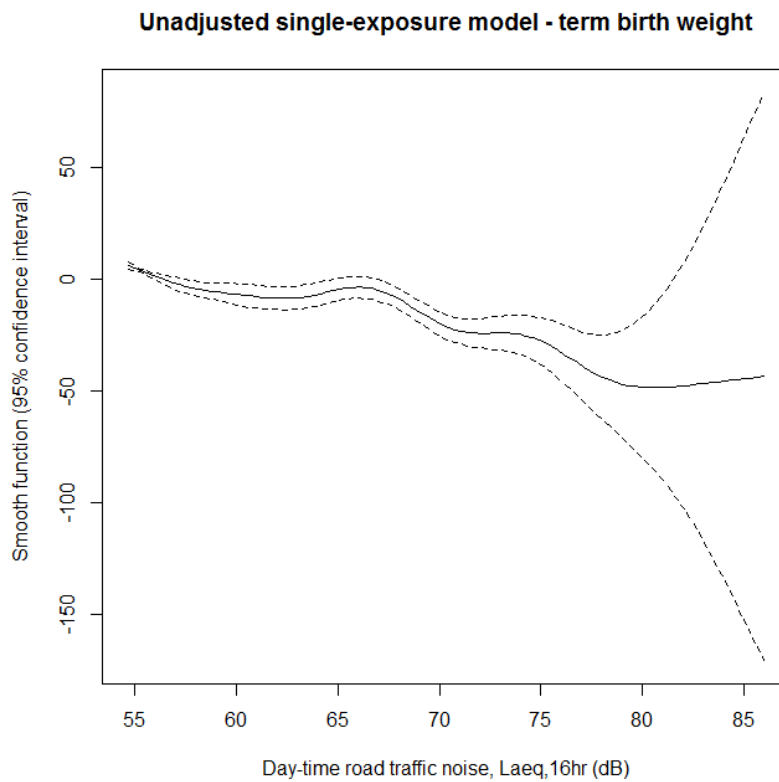

**Supplementary Figure 2: Mean difference in term birth weight (g), associated with IQR\* increases in air pollutants, in single- and two- air pollutant models**

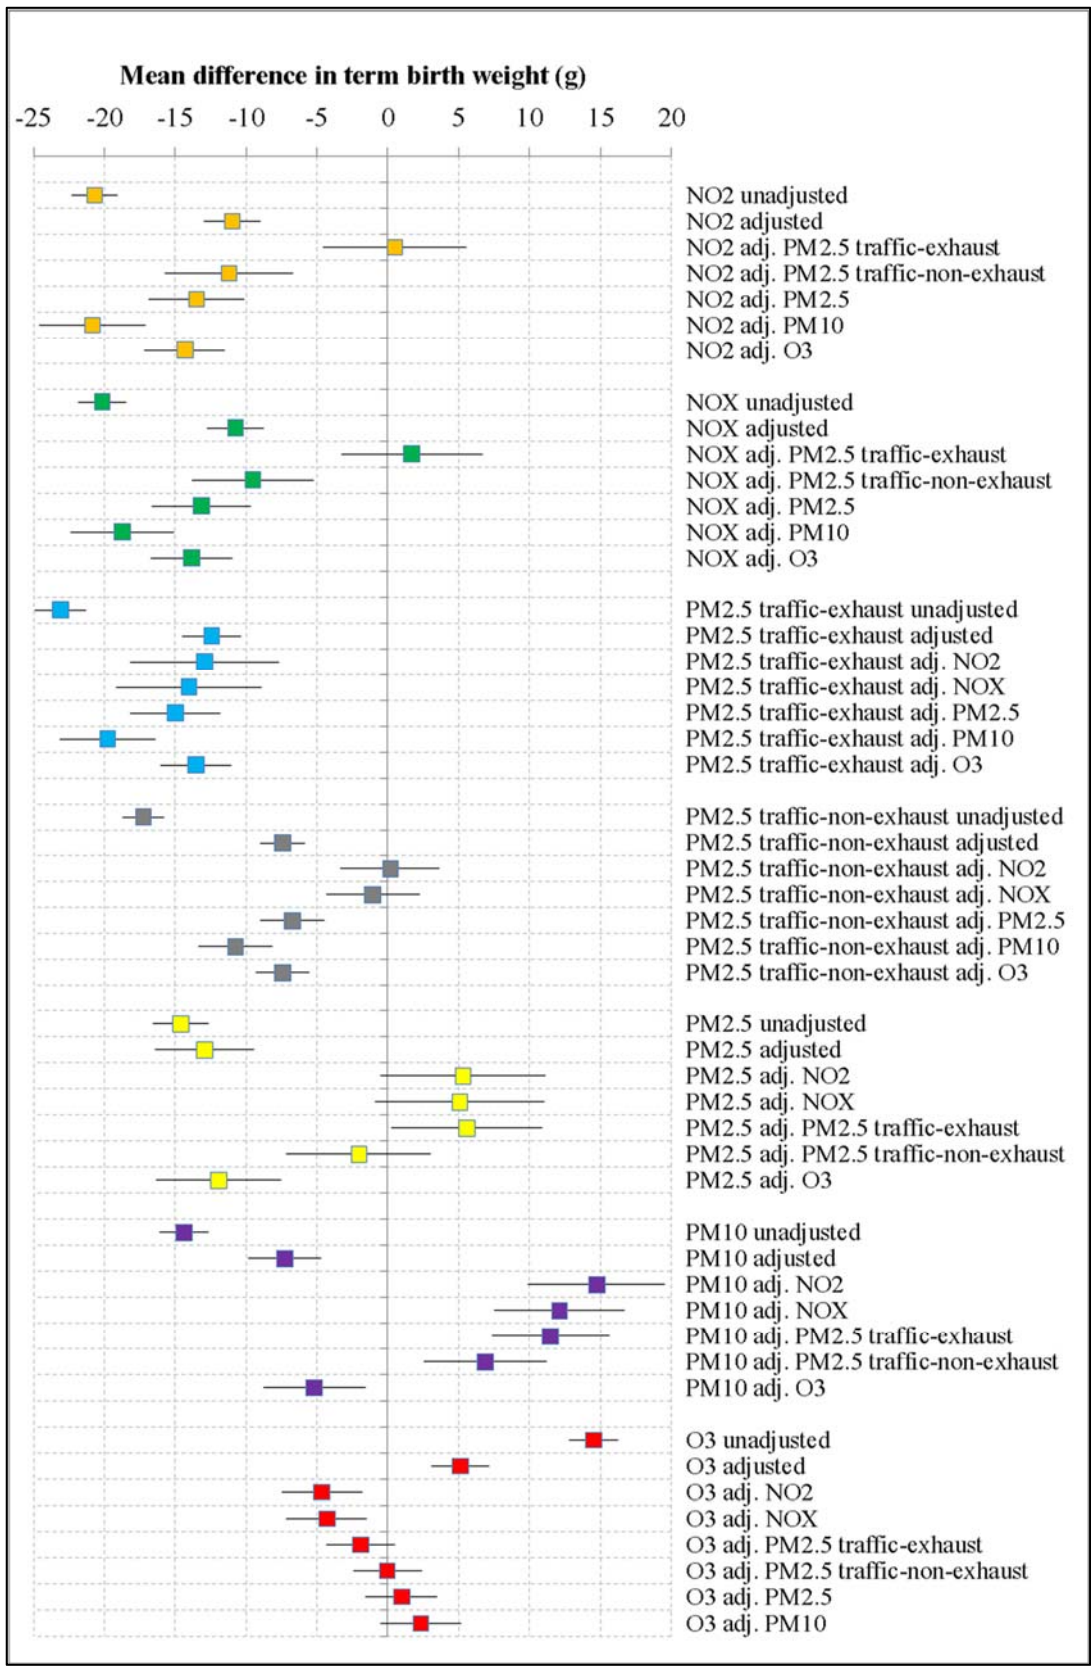

Supplementary Figure 2 footnotes: In Supplementary Figure 1 adjusted models are adjusted for sex, maternal age, birth registration type, tobacco expenditure (COA-level), Carstairs quintile (COA-level), individual-level ethnicity, gestational age as linear and quadratic terms, season of birth, year, and random intercept for MSOA in addition to including the air pollutants shown above. NO<sub>2</sub> and NO<sub>x</sub> were not entered into the same model together as they were too highly correlated. PM<sub>2.5</sub> and PM<sub>10</sub> were not entered into the same model together as PM<sub>2.5</sub> is a substantial subset of PM<sub>10</sub> (>50% by mass). \* IQR values for air pollutants: NO<sub>2</sub> (per IQR, 8.6 µg/m<sup>3</sup>), NO<sub>x</sub> (per IQR, 23.7 µg/m<sup>3</sup>), PM<sub>2.5</sub> traffic exhaust (per IQR, 0.35 µg/m<sup>3</sup>), PM<sub>2.5</sub> traffic non-exhaust (per IQR, 0.29 µg/m<sup>3</sup>), PM<sub>2.5</sub> (per IQR, 2.2 µg/m<sup>3</sup>), PM<sub>10</sub> (per IQR, 3.0 µg/m<sup>3</sup>), O<sub>3</sub> (per IQR, 8.4 µg/m<sup>3</sup>)

**Supplementary Figure 3: Adjusted mean difference in term birth weight (g), associated with air pollutants (per IQR) and night-time noise ( $L_{night}$ ), in single-exposure and joint-exposure models**

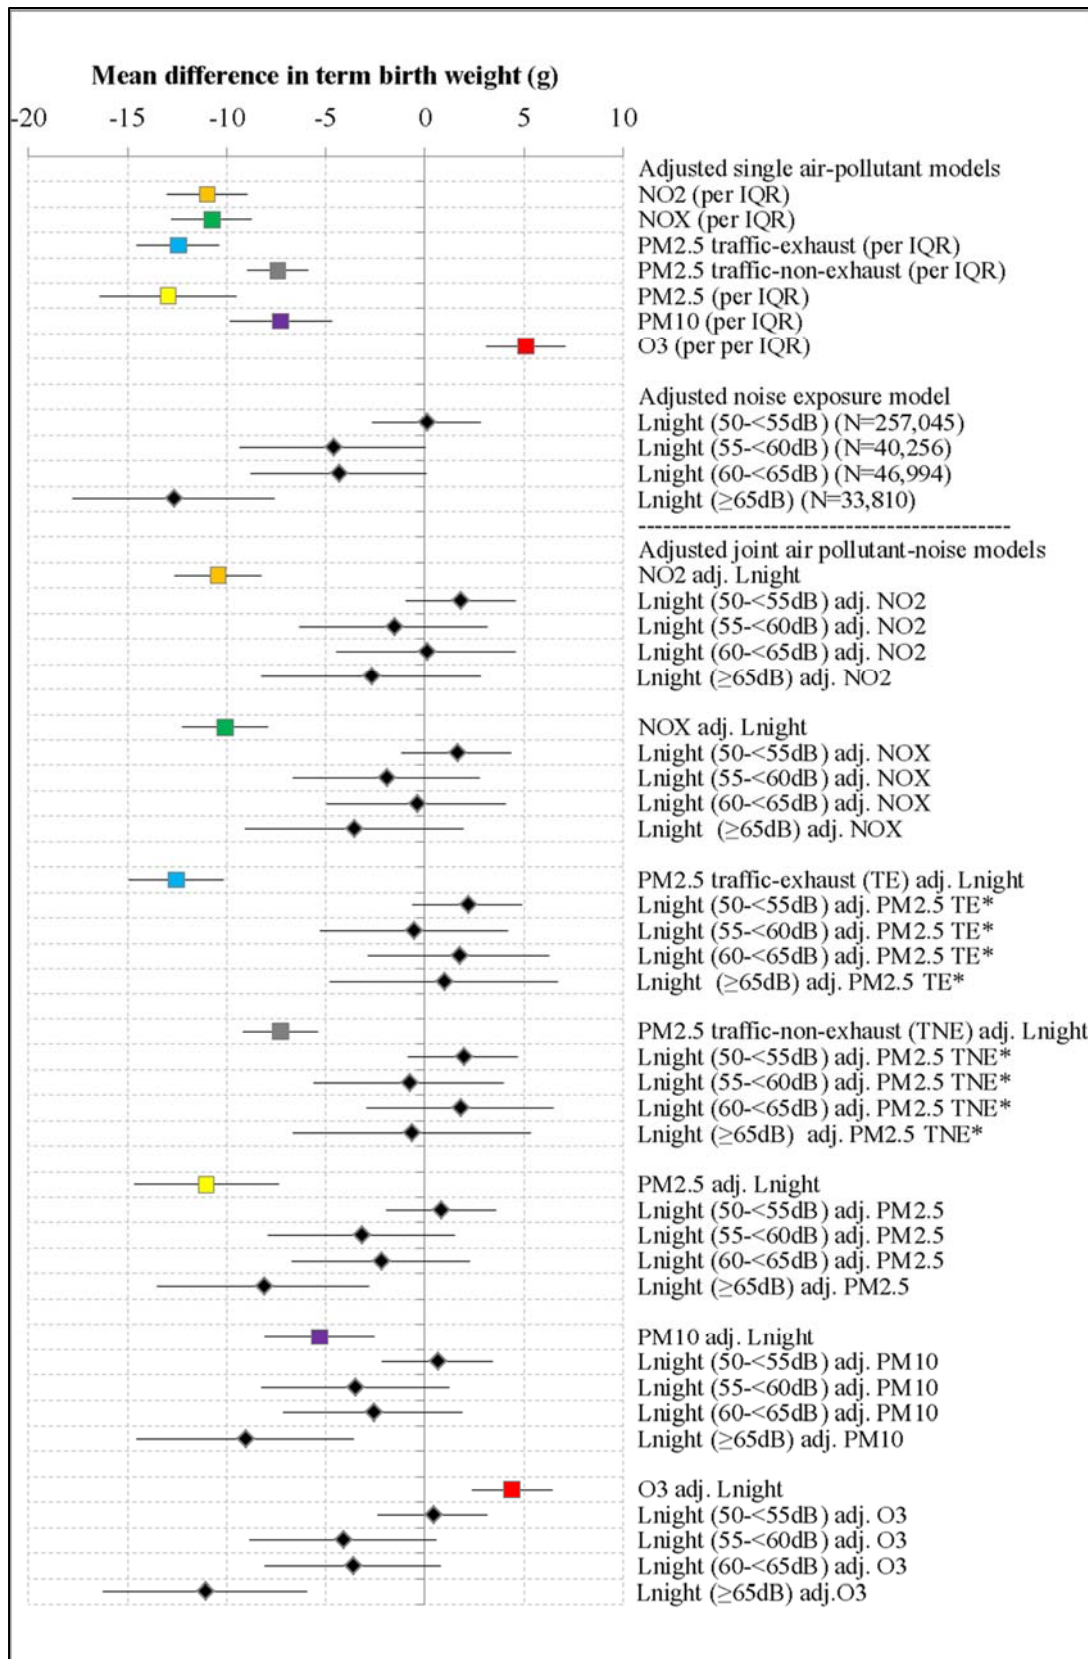

Supplementary Figure 3 footnotes: \* PM<sub>2.5</sub> TE is PM<sub>2.5</sub> traffic-exhaust, and PM<sub>2.5</sub> TNE is PM<sub>2.5</sub> traffic-non-exhaust. L<sub>night</sub> is night-time noise, and all noise ORs are vs. the reference group <50dB. All models in Figure 2 are adjusted for sex, maternal age, birth registration type, tobacco expenditure (COA-level), Carstairs quintile (COA-level), individual-level ethnicity, gestational age as linear and quadratic terms, season of birth, year, and random intercept for MSOA, in addition to including the air pollutant or noise metrics shown above. IQR values for air pollutants: NO<sub>2</sub> (per IQR, 8.6 µg/m<sup>3</sup>), NO<sub>x</sub> (per IQR, 23.7 µg/m<sup>3</sup>), PM<sub>2.5</sub> traffic exhaust (per IQR, 0.35 µg/m<sup>3</sup>), PM<sub>2.5</sub> traffic non-exhaust (per IQR, 0.29 µg/m<sup>3</sup>), PM<sub>2.5</sub> (per IQR, 2.2 µg/m<sup>3</sup>), PM<sub>10</sub> (per IQR, 3.0 µg/m<sup>3</sup>), O<sub>3</sub> (per IQR, 8.4 µg/m<sup>3</sup>)

**Supplementary Figure 4: Adjusted mean difference in term birth weight (g), associated with air pollutants (per IQR) and day-time noise ( $L_{Aeq,16hr}$ ), in single-exposure and joint-exposure models**

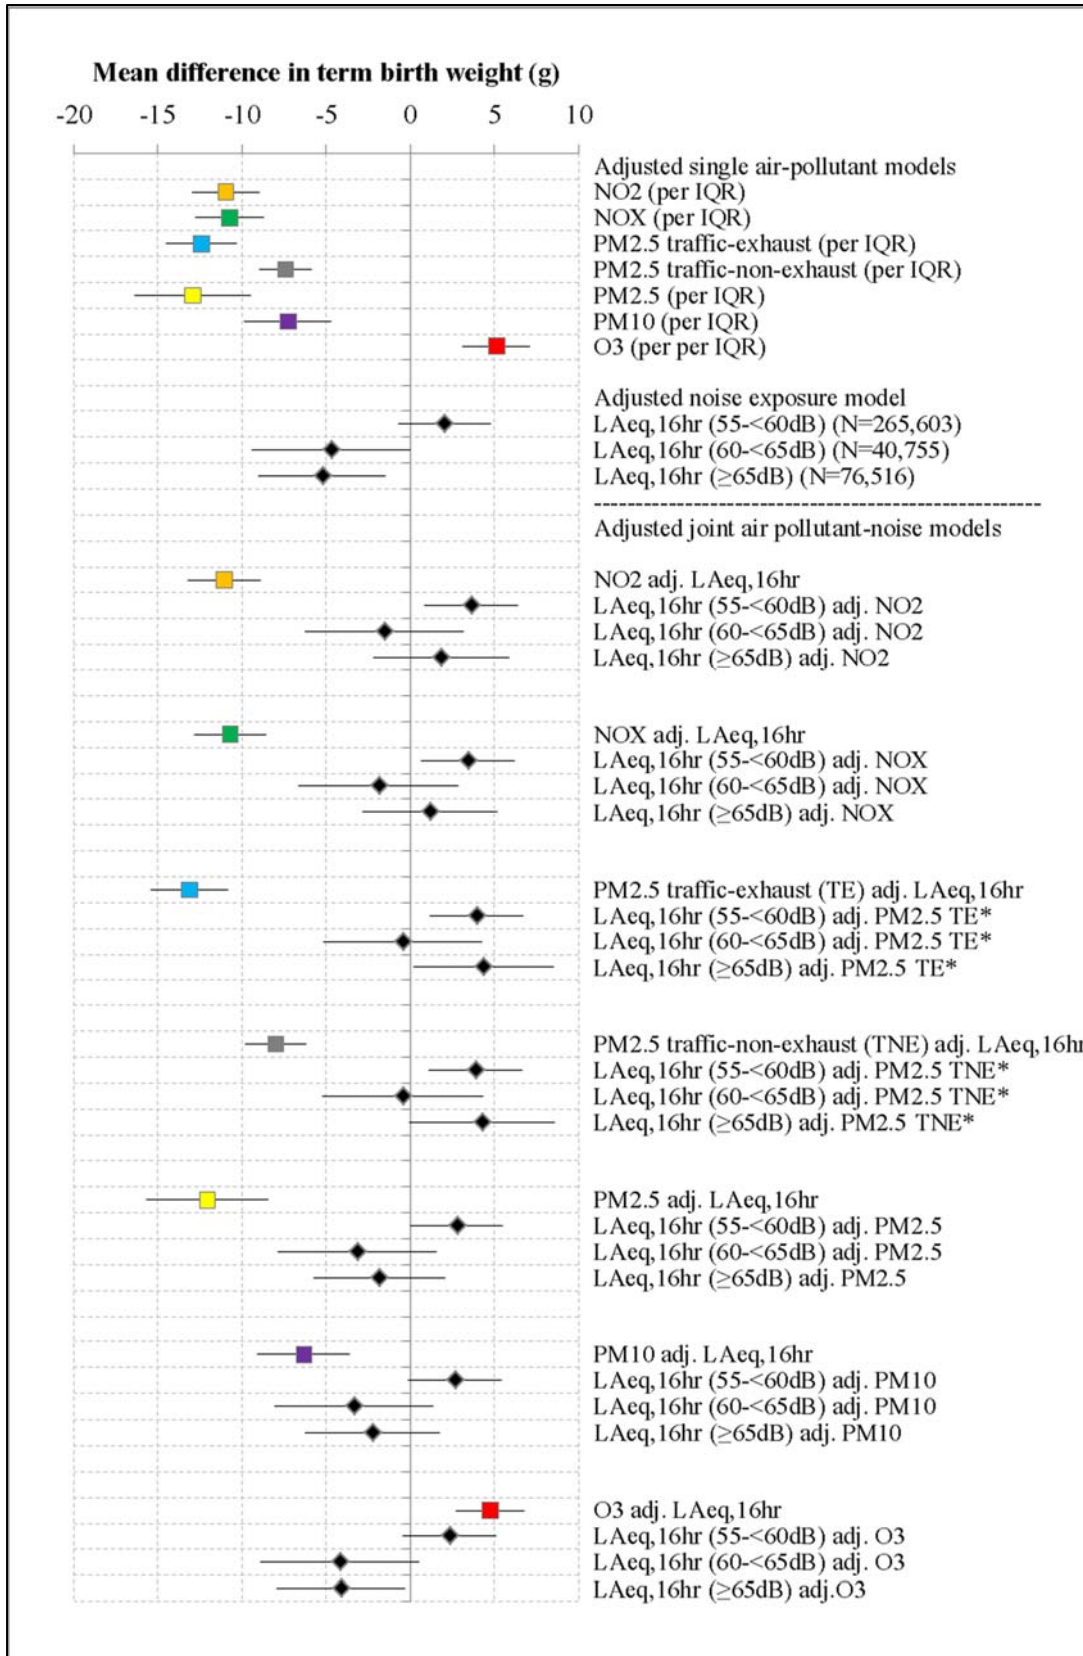



Supplementary Figure 4 footnotes: \* PM<sub>2.5</sub> TE is PM<sub>2.5</sub> traffic-exhaust, and PM<sub>2.5</sub> TNE is PM<sub>2.5</sub> traffic-non-exhaust. L<sub>Aeq,16hr</sub> is day-time noise, and all noise ORs are vs. the reference group <55dB. All models in Figure 3 are adjusted for sex, maternal age, birth registration type, tobacco expenditure (COA-level), Carstairs quintile (COA-level), individual-level ethnicity, gestational age as linear and quadratic terms, season of birth, year, and random intercept for MSOA in addition to including the air pollutant or noise metrics shown above. IQR values for air pollutants: NO<sub>2</sub> (per IQR, 8.6 µg/m<sup>3</sup>), NO<sub>x</sub> (per IQR, 23.7 µg/m<sup>3</sup>), PM<sub>2.5</sub> traffic exhaust (per IQR, 0.35 µg/m<sup>3</sup>), PM<sub>2.5</sub> traffic non-exhaust (per IQR, 0.29 µg/m<sup>3</sup>), PM<sub>2.5</sub> (per IQR, 2.2 µg/m<sup>3</sup>), PM<sub>10</sub> (per IQR, 3.0 µg/m<sup>3</sup>), O<sub>3</sub> (per IQR, 8.4 µg/m<sup>3</sup>)

**Supplementary Table 1: Air pollution and road traffic noise exposures in the study population (N=540,365) and their correlations**

|                                      |                                       | <u>Air pollutants (pregnancy average) (<math>\mu\text{g}/\text{m}^3</math>)</u> |                 |                                       |                                           |                   |                  | <u>Noise (annual average 2007) (dB)</u> |                       |                    |                  |      |                  |
|--------------------------------------|---------------------------------------|---------------------------------------------------------------------------------|-----------------|---------------------------------------|-------------------------------------------|-------------------|------------------|-----------------------------------------|-----------------------|--------------------|------------------|------|------------------|
|                                      |                                       | NO <sub>2</sub>                                                                 | NO <sub>X</sub> | PM <sub>2.5</sub> traffic-<br>exhaust | PM <sub>2.5</sub> traffic-<br>non-exhaust | PM <sub>2.5</sub> | PM <sub>10</sub> | O <sub>3</sub>                          | L <sub>Aeq,16hr</sub> | L <sub>night</sub> | L <sub>day</sub> | Leve | L <sub>den</sub> |
| <b><u>Summary statistics</u></b>     | <b>Mean</b>                           | 40.6                                                                            | 72.5            | 0.60                                  | 0.70                                      | 14.4              | 23.1             | 31.9                                    | 58.1                  | 53.2               | 58.4             | 56.8 | 59.8             |
|                                      | <b>SD</b>                             | 6.7                                                                             | 17.9            | 0.20                                  | 0.30                                      | 1.4               | 2.3              | 6.1                                     | 5.2                   | 5.4                | 5.2              | 4.9  | 5.2              |
|                                      | <b>Min</b>                            | 20.7                                                                            | 26.6            | 0.16                                  | 0.21                                      | 10.9              | 15.4             | 4.9                                     | 54.7                  | 49.6               | 55.0             | 53.7 | 56.3             |
|                                      | <b>IQR</b>                            | 8.6                                                                             | 23.7            | 0.35                                  | 0.29                                      | 2.2               | 3.0              | 8.4                                     | 3.5                   | 3.9                | 3.6              | 3.1  | 3.7              |
|                                      | <b>Max</b>                            | 185.2                                                                           | 520.3           | 7.10                                  | 6.60                                      | 26.6              | 48.8             | 51.4                                    | 86.0                  | 80.0               | 86.4             | 84.4 | 86.7             |
| <b><u>Spearman's correlation</u></b> | NO <sub>2</sub>                       | 1.00                                                                            |                 |                                       |                                           |                   |                  |                                         |                       |                    |                  |      |                  |
|                                      | NO <sub>X</sub>                       | 1.00                                                                            | 1.00            |                                       |                                           |                   |                  |                                         |                       |                    |                  |      |                  |
|                                      | PM <sub>2.5</sub> traffic-exhaust     | 0.95                                                                            | 0.95            | 1.00                                  |                                           |                   |                  |                                         |                       |                    |                  |      |                  |
|                                      | PM <sub>2.5</sub> traffic-non-exhaust | 0.90                                                                            | 0.89            | 0.93                                  | 1.00                                      |                   |                  |                                         |                       |                    |                  |      |                  |
|                                      | PM <sub>2.5</sub>                     | 0.68                                                                            | 0.69            | 0.68                                  | 0.45                                      | 1.00              |                  |                                         |                       |                    |                  |      |                  |
|                                      | PM <sub>10</sub>                      | 0.77                                                                            | 0.78            | 0.78                                  | 0.58                                      | 0.95              | 1.00             |                                         |                       |                    |                  |      |                  |
|                                      | O <sub>3</sub>                        | -0.76                                                                           | -0.77           | -0.68                                 | -0.66                                     | -0.46             | -0.54            | 1.00                                    |                       |                    |                  |      |                  |
|                                      | L <sub>Aeq, 16hr</sub>                | 0.31                                                                            | 0.29            | 0.38                                  | 0.48                                      | 0.15              | 0.23             | -0.14                                   | 1.00                  |                    |                  |      |                  |
|                                      | L <sub>night</sub>                    | 0.33                                                                            | 0.32            | 0.41                                  | 0.50                                      | 0.16              | 0.24             | -0.15                                   | 1.00                  | 1.00               |                  |      |                  |
|                                      | L <sub>day</sub>                      | 0.31                                                                            | 0.29            | 0.38                                  | 0.47                                      | 0.15              | 0.23             | -0.14                                   | 1.00                  | 1.00               | 1.00             |      |                  |
|                                      | Leve                                  | 0.31                                                                            | 0.30            | 0.38                                  | 0.48                                      | 0.15              | 0.23             | -0.14                                   | 1.00                  | 1.00               | 1.00             | 1.00 |                  |
|                                      | L <sub>den</sub>                      | 0.33                                                                            | 0.31            | 0.40                                  | 0.50                                      | 0.15              | 0.24             | -0.15                                   | 1.00                  | 1.00               | 1.00             | 1.00 | 1.00             |

**Supplementary Table 2: OR (95%CI) for term LBW and term SGA and mean difference (95% CI) in term birth weight (g) associated with potential confounding factors (univariate linear/logistic regression) in the study population (n=540,365)**

| Variable                                    | Term LBW |                   |         | Term SGA |                   |         | Term birth weight (g) |                            |         |
|---------------------------------------------|----------|-------------------|---------|----------|-------------------|---------|-----------------------|----------------------------|---------|
|                                             | N cases  | OR (95% CI)       | p-value | N cases  | OR (95% CI)       | p-value | N                     | MD (95%CI)                 | p-value |
| <b>Gestational Age (per completed week)</b> | 13804    | 0.41 (0.40, 0.41) | <0.001  |          |                   |         | 540365                | 136.38 (135.46, 137.31)    | <0.001  |
| <b>Tobacco expenditure (per £1) (COA)</b>   | 13804    | 1.08 (1.07, 1.08) | <0.001  | 44966    | 1.05 (1.04, 1.05) | <0.001  | 540365                | -14.43 (-15.07, -13.79)    | <0.001  |
| <b>Sex</b>                                  |          |                   |         |          |                   |         |                       |                            |         |
| Male                                        | 5641     | Reference         |         |          |                   |         | 275546                | Reference                  |         |
| Female                                      | 8163     | 1.52 (1.47, 1.57) |         |          |                   |         | 264819                | -125.50 (-127.99, -123.00) |         |
| <b>Maternal age</b>                         |          |                   |         |          |                   |         |                       |                            |         |
| <25 years                                   | 3339     | Reference         |         | 11029    | Reference         |         | 100931                | Reference                  |         |
| 25-29 years                                 | 3888     | 0.83 (0.79, 0.87) |         | 11937    | 0.74 (0.72, 0.76) |         | 140353                | 52.70 (48.90, 56.49)       |         |
| 30-34 years                                 | 3689     | 0.65 (0.62, 0.68) |         | 12770    | 0.64 (0.63, 0.66) |         | 169559                | 105.06 (101.40, 108.72)    |         |
| ≥35 years                                   | 2888     | 0.67 (0.63, 0.70) |         | 9230     | 0.61 (0.59, 0.63) |         | 129522                | 121.26 (117.40, 125.13)    |         |
| <i>p for trend</i>                          |          |                   |         |          |                   |         | 540365                |                            |         |
| <b>Ethnicity</b>                            |          |                   |         |          |                   |         |                       |                            |         |
| White                                       | 4890     | Reference         |         |          |                   |         | 286192                | Reference                  |         |
| Asian                                       | 4779     | 3.10 (2.97, 3.22) |         |          |                   |         | 93555                 | -274.77 (-278.17, -271.37) |         |
| Black                                       | 2536     | 1.64 (1.56, 1.72) |         |          |                   |         | 91740                 | -111.47 (-114.89, -108.04) |         |
| Other                                       | 1599     | 1.37 (1.29, 1.45) |         |          |                   |         | 68878                 | -91.38 (-95.21, -87.55)    |         |
| <b>Birth in marriage</b>                    |          |                   |         |          |                   |         |                       |                            |         |
| Within marriage <sup>†</sup>                | 8617     | Reference         |         | 25965    | Reference         |         | 348157                | Reference                  |         |
| Sole registration                           | 1234     | 1.40 (1.32, 1.49) |         | 3971     | 1.60 (1.55, 1.66) |         | 35937                 | -67.18 (-72.29, -62.07)    |         |
| Joint/same addr.                            | 2316     | 0.89 (0.85, 0.93) |         | 9503     | 1.24 (1.21, 1.27) |         | 105239                | 28.08 (24.84, 31.33)       |         |
| Joint/different addr.                       | 1637     | 1.31 (1.24, 1.38) |         | 5527     | 1.59 (1.55, 1.64) |         | 51032                 | -57.24 (-61.61, -52.86)    |         |
| <b>Year</b>                                 |          |                   |         |          |                   |         |                       |                            |         |
| 2006                                        | 2839     | Reference         |         | 9182     | Reference         |         | 101770                | Reference                  |         |
| 2007                                        | 2740     | 0.92 (0.87, 0.97) |         | 8954     | 0.93 (0.90, 0.96) |         | 106528                | 5.91 (1.86, 9.96)          |         |
| 2008                                        | 2755     | 0.92 (0.88, 0.97) |         | 8738     | 0.90 (0.87, 0.93) |         | 106678                | 11.91 (7.86, 15.96)        |         |
| 2009                                        | 2747     | 0.89 (0.85, 0.94) |         | 8905     | 0.89 (0.86, 0.91) |         | 110014                | 14.44 (10.42, 18.46)       |         |
| 2010                                        | 2723     | 0.84 (0.80, 0.89) |         | 9187     | 0.87 (0.84, 0.90) |         | 115375                | 15.82 (11.85, 19.79)       |         |
| <i>p for trend</i>                          |          |                   | <0.001  |          |                   | <0.001  | 540365                |                            | <0.001  |
| <b>Season</b>                               |          |                   |         |          |                   |         |                       |                            |         |
| Winter                                      | 3455     | Reference         |         | 11058    | Reference         |         | 130033                | Reference                  |         |
| Spring                                      | 3449     | 0.97 (0.93, 1.02) |         | 11318    | 0.99 (0.97, 1.02) |         | 133395                | 8.35 (4.75, 11.95)         |         |
| Summer                                      | 3463     | 0.94 (0.90, 0.99) |         | 11325    | 0.96 (0.93, 0.99) |         | 138418                | 17.04 (13.48, 20.61)       |         |
| Autumn                                      | 3437     | 0.93 (0.89, 0.98) |         | 11265    | 0.95 (0.92, 0.98) |         | 138519                | 16.31 (12.74, 19.88)       |         |
| <b>Carstairs quintile (COA)</b>             |          |                   |         |          |                   |         |                       |                            |         |
| 1 - least deprived                          | 1324     | Reference         |         | 5961     | Reference         |         | 85358                 | Reference                  |         |
| 2                                           | 1875     | 1.32 (1.23, 1.41) |         | 7229     | 1.17 (1.13, 1.21) |         | 92264                 | -34.31 (-38.68, -29.94)    |         |
| 3                                           | 2448     | 1.58 (1.47, 1.69) |         | 8217     | 1.25 (1.20, 1.29) |         | 100934                | -67.61 (-71.89, -63.34)    |         |
| 4                                           | 3450     | 1.89 (1.77, 2.02) |         | 10330    | 1.35 (1.31, 1.40) |         | 119239                | -99.05 (-103.17, -94.92)   |         |
| 5 - most deprived                           | 4707     | 2.17 (2.04, 2.30) |         | 13229    | 1.43 (1.39, 1.48) |         | 142570                | -132.64 (-136.62, -128.66) |         |
| <i>p for trend</i>                          |          |                   | <0.001  |          |                   | <0.001  | 540365                |                            | <0.001  |
| <b>Inner/Outer London</b>                   |          |                   |         |          |                   |         |                       |                            |         |
| Inner                                       | 4372     | Reference         |         | 14886    | Reference         |         | 173181                | Reference                  |         |
| Outer                                       | 9432     | 1.02 (0.98, 1.06) |         | 30080    | 0.93 (0.92, 0.95) |         | 367184                | -3.75 (-6.45, -1.06)       |         |

Abbreviations: LBW, low birth weight (<2500g); SGA, small-for-gestational-age. <sup>†</sup>includes civil partnerships.

**Supplementary Table 3: Mean difference (95% CI) in exposure metric associated with potential confounding factors (univariate linear regression) in the study population (n=540,365)**

| Variable                                    | NO <sub>2</sub> (pregnancy average, µg/m <sup>3</sup> ) |                      |         | NO <sub>x</sub> (pregnancy average, µg/m <sup>3</sup> ) |         | PM <sub>2.5</sub> traffic-exhaust (pregnancy average, µg/m <sup>3</sup> ) |         | PM <sub>2.5</sub> traffic-non-exhaust (pregnancy average, µg/m <sup>3</sup> ) |         |
|---------------------------------------------|---------------------------------------------------------|----------------------|---------|---------------------------------------------------------|---------|---------------------------------------------------------------------------|---------|-------------------------------------------------------------------------------|---------|
|                                             | N                                                       | MD (95%CI)           | p-value | MD (95%CI)                                              | p-value | MD (95%CI)                                                                | p-value | MD (95%CI)                                                                    | p-value |
| <b>Gestational Age (per completed week)</b> | 540365                                                  | 0.06 (0.04, 0.07)    |         | 0.15 (0.12, 0.19)                                       |         | 0.00 (0.00, 0.00)                                                         |         | 0.00 (0.00, 0.00)                                                             |         |
| <b>Tobacco expenditure (per £1) (COA)</b>   | 540365                                                  | 0.79 (0.78, 0.79)    |         | 2.03 (2.01, 2.05)                                       |         | 0.03 (0.03, 0.03)                                                         |         | 0.03 (0.03, 0.03)                                                             |         |
| <b>Sex</b>                                  |                                                         |                      |         |                                                         |         |                                                                           |         |                                                                               |         |
| Male                                        | 275546                                                  | Reference            |         | Reference                                               |         | Reference                                                                 |         | Reference                                                                     |         |
| Female                                      | 264819                                                  | -0.02 (-0.05, 0.02)  |         | -0.05 (-0.14, 0.05)                                     |         | -0.00 (-0.00, 0.00)                                                       |         | -0.00 (-0.00, 0.00)                                                           |         |
| <b>Maternal age</b>                         |                                                         |                      |         |                                                         |         |                                                                           |         |                                                                               |         |
| <25 years                                   | 100931                                                  | Reference            |         | Reference                                               |         | Reference                                                                 |         | Reference                                                                     |         |
| 25-29 years                                 | 140353                                                  | -0.26 (-0.32, -0.21) |         | -0.70 (-0.84, -0.55)                                    |         | -0.01 (-0.01, -0.01)                                                      |         | -0.01 (-0.01, -0.01)                                                          |         |
| 30-34 years                                 | 169559                                                  | -0.34 (-0.39, -0.29) |         | -0.86 (-1.00, -0.72)                                    |         | -0.02 (-0.02, -0.01)                                                      |         | -0.01 (-0.02, -0.01)                                                          |         |
| ≥35 years                                   | 129522                                                  | -0.14 (-0.19, -0.08) |         | -0.29 (-0.44, -0.15)                                    |         | -0.01 (-0.01, -0.01)                                                      |         | -0.01 (-0.01, -0.01)                                                          |         |
| <i>p for trend</i>                          | 540365                                                  |                      | <0.001  |                                                         | <0.001  |                                                                           | <0.001  |                                                                               | <0.001  |
| <b>Ethnicity</b>                            |                                                         |                      |         |                                                         |         |                                                                           |         |                                                                               |         |
| White                                       | 286192                                                  | Reference            |         | Reference                                               |         | Reference                                                                 |         | Reference                                                                     |         |
| Asian                                       | 93555                                                   | 1.05 (1.00, 1.10)    |         | 2.55 (2.42, 2.68)                                       |         | 0.03 (0.03, 0.03)                                                         |         | 0.04 (0.04, 0.04)                                                             |         |
| Black                                       | 91740                                                   | 2.23 (2.18, 2.28)    |         | 5.67 (5.54, 5.80)                                       |         | 0.07 (0.07, 0.07)                                                         |         | 0.08 (0.08, 0.08)                                                             |         |
| Other                                       | 68878                                                   | 1.58 (1.52, 1.63)    |         | 4.02 (3.88, 4.17)                                       |         | 0.05 (0.05, 0.06)                                                         |         | 0.06 (0.06, 0.06)                                                             |         |
| <b>Birth in marriage</b>                    |                                                         |                      |         |                                                         |         |                                                                           |         |                                                                               |         |
| Within marriage <sup>†</sup>                | 348157                                                  | Reference            |         | Reference                                               |         | Reference                                                                 |         | Reference                                                                     |         |
| Sole registration                           | 35937                                                   | 0.71 (0.63, 0.78)    |         | 1.82 (1.62, 2.01)                                       |         | 0.03 (0.03, 0.03)                                                         |         | 0.03 (0.02, 0.03)                                                             |         |
| Joint/same address                          | 105239                                                  | -0.66 (-0.70, -0.61) |         | -1.70 (-1.82, -1.58)                                    |         | -0.02 (-0.02, -0.02)                                                      |         | -0.02 (-0.02, -0.02)                                                          |         |
| Joint/different address                     | 51032                                                   | 0.20 (0.14, 0.27)    |         | 0.50 (0.34, 0.67)                                       |         | 0.01 (0.01, 0.01)                                                         |         | 0.01 (0.01, 0.01)                                                             |         |
| <b>Year</b>                                 |                                                         |                      |         |                                                         |         |                                                                           |         |                                                                               |         |
| 2006                                        | 101770                                                  | Reference            |         | Reference                                               |         | Reference                                                                 |         | Reference                                                                     |         |
| 2007                                        | 106528                                                  | -1.74 (-1.80, -1.69) |         | -5.84 (-5.98, -5.69)                                    |         | -0.09 (-0.09, -0.09)                                                      |         | -0.02 (-0.03, -0.02)                                                          |         |
| 2008                                        | 106678                                                  | -0.23 (-0.29, -0.18) |         | 0.17 (0.02, 0.31)                                       |         | -0.08 (-0.08, -0.08)                                                      |         | 0.05 (0.05, 0.05)                                                             |         |
| 2009                                        | 110014                                                  | -1.25 (-1.31, -1.20) |         | -4.51 (-4.65, -4.36)                                    |         | -0.12 (-0.12, -0.12)                                                      |         | 0.06 (0.06, 0.06)                                                             |         |
| 2010                                        | 115375                                                  | -5.04 (-5.10, -4.99) |         | -14.39 (-14.53, -14.24)                                 |         | -0.21 (-0.21, -0.21)                                                      |         | -0.03 (-0.03, -0.02)                                                          |         |
| <i>p for trend</i>                          | 540365                                                  |                      | <0.001  |                                                         | <0.001  |                                                                           | <0.001  |                                                                               | <0.001  |
| <b>Season</b>                               |                                                         |                      |         |                                                         |         |                                                                           |         |                                                                               |         |
| Winter                                      | 130033                                                  | Reference            |         | Reference                                               |         | Reference                                                                 |         | Reference                                                                     |         |
| Spring                                      | 133395                                                  | 3.69 (3.64, 3.73)    |         | 9.48 (9.35, 9.61)                                       |         | 0.06 (0.06, 0.07)                                                         |         | 0.07 (0.07, 0.07)                                                             |         |
| Summer                                      | 138418                                                  | 2.33 (2.29, 2.38)    |         | 6.06 (5.94, 6.19)                                       |         | 0.02 (0.02, 0.02)                                                         |         | 0.03 (0.03, 0.04)                                                             |         |
| Autumn                                      | 138519                                                  | -2.26 (-2.31, -2.21) |         | -6.18 (-6.31, -6.05)                                    |         | -0.07 (-0.08, -0.07)                                                      |         | -0.06 (-0.06, -0.06)                                                          |         |
| <b>Carstairs quintile (COA)</b>             |                                                         |                      |         |                                                         |         |                                                                           |         |                                                                               |         |
| 1 - least deprived                          | 85358                                                   | Reference            |         | Reference                                               |         | Reference                                                                 |         | Reference                                                                     |         |
| 2                                           | 92264                                                   | 2.05 (1.99, 2.11)    |         | 5.19 (5.03, 5.35)                                       |         | 0.07 (0.07, 0.07)                                                         |         | 0.08 (0.07, 0.08)                                                             |         |
| 3                                           | 100934                                                  | 3.10 (3.04, 3.16)    |         | 7.82 (7.67, 7.98)                                       |         | 0.10 (0.10, 0.10)                                                         |         | 0.11 (0.11, 0.11)                                                             |         |
| 4                                           | 119239                                                  | 3.84 (3.78, 3.89)    |         | 9.66 (9.50, 9.81)                                       |         | 0.12 (0.12, 0.12)                                                         |         | 0.14 (0.13, 0.14)                                                             |         |
| 5 - most deprived                           | 142570                                                  | 5.69 (5.63, 5.74)    |         | 14.48 (14.33, 14.63)                                    |         | 0.19 (0.19, 0.19)                                                         |         | 0.20 (0.20, 0.20)                                                             |         |
| <i>p for trend</i>                          | 540365                                                  |                      | <0.001  |                                                         | <0.001  |                                                                           | <0.001  |                                                                               | <0.001  |
| <b>Inner/Outer London</b>                   |                                                         |                      |         |                                                         |         |                                                                           |         |                                                                               |         |
| Inner                                       | 173181                                                  | Reference            |         | Reference                                               |         | Reference                                                                 |         | Reference                                                                     |         |
| Outer                                       | 367184                                                  | -6.72 (-6.75, -6.69) |         | -17.46 (-17.55, -17.36)                                 |         | -0.25 (-0.25, -0.24)                                                      |         | -0.23 (-0.23, -0.22)                                                          |         |

Supplementary Table 3 cont/d.

| Variable                                    | PM <sub>2.5</sub> (pregnancy average, µg/m <sup>3</sup> ) |         | PM <sub>10</sub> (pregnancy average, µg/m <sup>3</sup> ) |         | O <sub>3</sub> (pregnancy average, µg/m <sup>3</sup> ) |         | L <sub>Aeq,16hr</sub> (dB) |         | L <sub>night</sub> (dB) |         |
|---------------------------------------------|-----------------------------------------------------------|---------|----------------------------------------------------------|---------|--------------------------------------------------------|---------|----------------------------|---------|-------------------------|---------|
|                                             | MD (95%CI)                                                | p-value | MD (95%CI)                                               | p-value | MD (95%CI)                                             | p-value | MD (95%CI)                 | p-value | MD (95%CI)              | p-value |
| <b>Gestational Age (per completed week)</b> | 0.02 (0.02, 0.02)                                         |         | 0.03 (0.03, 0.04)                                        |         | -0.05 (-0.06, -0.04)                                   |         | 0.02 (0.01, 0.03)          |         | 0.02 (0.01, 0.03)       |         |
| <b>Tobacco expenditure (per £1) (COA)</b>   | 0.08 (0.08, 0.08)                                         |         | 0.17 (0.16, 0.17)                                        |         | -0.42 (-0.43, -0.41)                                   |         | 0.15 (0.14, 0.15)          |         | 0.18 (0.17, 0.19)       |         |
| <b>Sex</b>                                  |                                                           |         |                                                          |         |                                                        |         |                            |         |                         |         |
| Male                                        | Reference                                                 |         | Reference                                                |         | Reference                                              |         | Reference                  |         | Reference               |         |
| Female                                      | -0.01 (-0.01, 0.00)                                       |         | -0.01 (-0.02, 0.01)                                      |         | 0.00 (-0.03, 0.04)                                     |         | 0.01 (-0.02, 0.04)         |         | 0.01 (-0.02, 0.04)      |         |
| <b>Maternal age</b>                         |                                                           |         |                                                          |         |                                                        |         |                            |         |                         |         |
| <25 years                                   | Reference                                                 |         | Reference                                                |         | Reference                                              |         | Reference                  |         | Reference               |         |
| 25-29 years                                 | -0.07 (-0.09, -0.06)                                      |         | -0.13 (-0.15, -0.11)                                     |         | 0.19 (0.14, 0.24)                                      |         | -0.08 (-0.12, -0.04)       |         | -0.10 (-0.14, -0.05)    |         |
| 30-34 years                                 | -0.10 (-0.11, -0.09)                                      |         | -0.19 (-0.21, -0.18)                                     |         | 0.27 (0.22, 0.31)                                      |         | -0.39 (-0.43, -0.35)       |         | -0.41 (-0.45, -0.37)    |         |
| ≥35 years                                   | -0.09 (-0.10, -0.08)                                      |         | -0.17 (-0.18, -0.15)                                     |         | 0.10 (0.05, 0.15)                                      |         | -0.60 (-0.65, -0.56)       |         | -0.63 (-0.67, -0.58)    |         |
| <i>p for trend</i>                          |                                                           | <0.001  |                                                          | <0.001  |                                                        | <0.001  |                            | <0.001  |                         | <0.001  |
| <b>Ethnicity</b>                            |                                                           |         |                                                          |         |                                                        |         |                            |         |                         |         |
| White                                       | Reference                                                 |         | Reference                                                |         | Reference                                              |         | Reference                  |         | Reference               |         |
| Asian                                       | 0.10 (0.09, 0.11)                                         |         | 0.20 (0.18, 0.22)                                        |         | -0.65 (-0.70, -0.61)                                   |         | 0.35 (0.31, 0.38)          |         | 0.36 (0.33, 0.40)       |         |
| Black                                       | 0.26 (0.25, 0.27)                                         |         | 0.52 (0.50, 0.53)                                        |         | -1.32 (-1.36, -1.27)                                   |         | 0.45 (0.41, 0.49)          |         | 0.53 (0.49, 0.57)       |         |
| Other                                       | 0.16 (0.15, 0.17)                                         |         | 0.33 (0.31, 0.35)                                        |         | -0.81 (-0.86, -0.76)                                   |         | 0.63 (0.58, 0.67)          |         | 0.67 (0.62, 0.71)       |         |
| <b>Birth in marriage</b>                    |                                                           |         |                                                          |         |                                                        |         |                            |         |                         |         |
| Within marriage <sup>†</sup>                | Reference                                                 |         | Reference                                                |         | Reference                                              |         | Reference                  |         | Reference               |         |
| Sole registration                           | 0.13 (0.11, 0.14)                                         |         | 0.24 (0.22, 0.27)                                        |         | -0.42 (-0.48, -0.35)                                   |         | 0.39 (0.33, 0.44)          |         | 0.43 (0.37, 0.48)       |         |
| Joint/same address                          | -0.07 (-0.08, -0.06)                                      |         | -0.12 (-0.14, -0.11)                                     |         | 0.42 (0.38, 0.46)                                      |         | 0.19 (0.15, 0.22)          |         | 0.19 (0.15, 0.22)       |         |
| Joint/different address                     | 0.01 (-0.01, 0.02)                                        |         | 0.03 (0.01, 0.05)                                        |         | -0.09 (-0.15, -0.04)                                   |         | 0.15 (0.10, 0.19)          |         | 0.18 (0.13, 0.23)       |         |
| <b>Year</b>                                 |                                                           |         |                                                          |         |                                                        |         |                            |         |                         |         |
| 2006                                        | Reference                                                 |         | Reference                                                |         | Reference                                              |         | Reference                  |         | Reference               |         |
| 2007                                        | -1.27 (-1.28, -1.27)                                      |         | -0.97 (-0.99, -0.96)                                     |         | 3.79 (3.75, 3.84)                                      |         | 0.04 (-0.00, 0.09)         |         | 0.04 (-0.00, 0.09)      |         |
| 2008                                        | -1.56 (-1.57, -1.56)                                      |         | -1.56 (-1.58, -1.55)                                     |         | 0.21 (0.16, 0.25)                                      |         | 0.07 (0.03, 0.12)          |         | 0.07 (0.03, 0.12)       |         |
| 2009                                        | -2.11 (-2.11, -2.10)                                      |         | -2.44 (-2.45, -2.43)                                     |         | -2.97 (-3.01, -2.92)                                   |         | 0.11 (0.06, 0.15)          |         | 0.11 (0.06, 0.16)       |         |
| 2010                                        | -3.19 (-3.20, -3.18)                                      |         | -4.58 (-4.59, -4.56)                                     |         | 6.08 (6.04, 6.12)                                      |         | 0.19 (0.15, 0.24)          |         | 0.20 (0.16, 0.25)       |         |
| <i>p for trend</i>                          |                                                           | <0.001  |                                                          | <0.001  |                                                        | <0.001  |                            | <0.001  |                         | <0.001  |
| <b>Season</b>                               |                                                           |         |                                                          |         |                                                        |         |                            |         |                         |         |
| Winter                                      | Reference                                                 |         | Reference                                                |         | Reference                                              |         | Reference                  |         | Reference               |         |
| Spring                                      | 0.88 (0.87, 0.89)                                         |         | 1.20 (1.19, 1.22)                                        |         | -3.66 (-3.70, -3.62)                                   |         | -0.07 (-0.11, -0.03)       |         | -0.08 (-0.12, -0.04)    |         |
| Summer                                      | 1.09 (1.08, 1.10)                                         |         | 1.18 (1.16, 1.20)                                        |         | 1.80 (1.76, 1.83)                                      |         | -0.03 (-0.07, 0.01)        |         | -0.04 (-0.08, 0.00)     |         |
| Autumn                                      | -0.02 (-0.03, -0.01)                                      |         | -0.33 (-0.34, -0.31)                                     |         | 5.04 (5.00, 5.08)                                      |         | -0.02 (-0.06, 0.02)        |         | -0.02 (-0.06, 0.02)     |         |
| <b>Carstairs quintile (COA)</b>             |                                                           |         |                                                          |         |                                                        |         |                            |         |                         |         |
| 1 - least deprived                          | Reference                                                 |         | Reference                                                |         | Reference                                              |         | Reference                  |         | Reference               |         |
| 2                                           | 0.17 (0.15, 0.18)                                         |         | 0.37 (0.35, 0.39)                                        |         | -1.09 (-1.15, -1.04)                                   |         | 0.83 (0.79, 0.88)          |         | 0.90 (0.85, 0.95)       |         |
| 3                                           | 0.26 (0.24, 0.27)                                         |         | 0.56 (0.54, 0.58)                                        |         | -1.74 (-1.79, -1.68)                                   |         | 1.07 (1.03, 1.12)          |         | 1.17 (1.12, 1.22)       |         |
| 4                                           | 0.34 (0.33, 0.35)                                         |         | 0.75 (0.73, 0.77)                                        |         | -2.16 (-2.21, -2.11)                                   |         | 1.18 (1.14, 1.23)          |         | 1.31 (1.26, 1.35)       |         |
| 5 - most deprived                           | 0.56 (0.55, 0.57)                                         |         | 1.18 (1.16, 1.20)                                        |         | -3.18 (-3.23, -3.13)                                   |         | 1.21 (1.16, 1.25)          |         | 1.42 (1.37, 1.46)       |         |
| <i>p for trend</i>                          |                                                           | <0.001  |                                                          | <0.001  |                                                        | <0.001  |                            | <0.001  |                         | <0.001  |
| <b>Inner/Outer London</b>                   |                                                           |         |                                                          |         |                                                        |         |                            |         |                         |         |
| Inner                                       | Reference                                                 |         | Reference                                                |         | Reference                                              |         | Reference                  |         | Reference               |         |
| Outer                                       | -0.63 (-0.63, -0.62)                                      |         | -1.29 (-1.30, -1.28)                                     |         | 3.68 (3.64, 3.71)                                      |         | -0.80 (-0.83, -0.77)       |         | -1.04 (-1.07, -1.01)    |         |

<sup>†</sup>includes civil partnerships.

**Supplementary Table 4: Odds of term LBW (<2500g and ≥37 weeks gestation) associated with air pollutants and noise (OR, 95% confidence intervals)**

| Exposure                                              | Unadjusted single-exposure model |         |                   |         | Adjusted single-exposure model |         |
|-------------------------------------------------------|----------------------------------|---------|-------------------|---------|--------------------------------|---------|
|                                                       | N                                | N cases | OR (95% CI)       | p-value | OR (95% CI)                    | p-value |
| <b>NO<sub>2</sub> (per IQR)</b>                       | 540,365                          | 13,804  | 1.10 (1.07, 1.12) |         | 1.03 (1.00, 1.06)              |         |
| <b>NO<sub>x</sub> (per IQR)</b>                       | 540,365                          | 13,804  | 1.09 (1.07, 1.12) |         | 1.03 (1.01, 1.06)              |         |
| <b>PM<sub>2.5</sub> traffic-exhaust (per IQR)</b>     | 540,365                          | 13,804  | 1.10 (1.08, 1.13) |         | 1.04 (1.01, 1.07)              |         |
| <b>PM<sub>2.5</sub> traffic-non-exhaust (per IQR)</b> | 540,365                          | 13,804  | 1.07 (1.05, 1.09) |         | 1.02 (1.00, 1.04)              |         |
| <b>PM<sub>2.5</sub> (per IQR)</b>                     | 540,365                          | 13,804  | 1.10 (1.08, 1.13) |         | 1.06 (1.01, 1.12)              |         |
| <b>PM<sub>10</sub> (per IQR)</b>                      | 540,365                          | 13,804  | 1.09 (1.07, 1.12) |         | 1.03 (0.99, 1.07)              |         |
| <b>O<sub>3</sub> (per IQR)</b>                        | 540,365                          | 13,804  | 0.92 (0.90, 0.95) |         | 0.96 (0.93, 0.99)              |         |
| <b>Day-time noise, L<sub>Aeq,16hr</sub></b>           |                                  |         |                   |         |                                |         |
| <55dB                                                 | 157,491                          | 3,956   | Reference         |         | Reference                      |         |
| 55-<60 dB                                             | 265,603                          | 6,719   | 1.01 (0.97, 1.05) |         | 0.98 (0.94, 1.02)              |         |
| 60-<65 dB                                             | 40,755                           | 1,093   | 1.07 (1.00, 1.14) |         | 1.02 (0.95, 1.10)              |         |
| ≥65dB                                                 | 76,516                           | 2,036   | 1.06 (1.00, 1.12) |         | 1.01 (0.95, 1.07)              |         |
| p for trend                                           | 540,365                          |         |                   | 0.012   |                                | 0.572   |
| <b>Night-time noise, L<sub>night</sub></b>            |                                  |         |                   |         |                                |         |
| <50dB                                                 | 162,260                          | 4,032   | Reference         |         | Reference                      |         |
| 50-<55 dB                                             | 257,045                          | 6,546   | 1.03 (0.99, 1.07) |         | 0.99 (0.95, 1.03)              |         |
| 55-<60 dB                                             | 40,256                           | 1,054   | 1.06 (0.99, 1.13) |         | 1.01 (0.94, 1.09)              |         |
| 60-<65 dB                                             | 46,994                           | 1,253   | 1.07 (1.01, 1.15) |         | 1.02 (0.95, 1.09)              |         |
| ≥65dB                                                 | 33,810                           | 919     | 1.10 (1.02, 1.18) |         | 1.03 (0.95, 1.11)              |         |
| p for trend                                           | 540,365                          |         |                   | 0.002   |                                | 0.349   |

Adjusted model covariates: sex, maternal age, birth registration type, tobacco expenditure (COA-level), Carstairs quintile (COA-level), individual-level ethnicity, gestational age as linear and quadratic terms, season of birth, year (linear term) and random intercept for MSOA. IQR values for air pollutants: NO<sub>2</sub> (per IQR, 8.6 µg/m<sup>3</sup>), NO<sub>x</sub> (per IQR, 23.7 µg/m<sup>3</sup>), PM<sub>2.5</sub> traffic exhaust (per IQR, 0.35 µg/m<sup>3</sup>), PM<sub>2.5</sub> traffic non-exhaust (per IQR, 0.29 µg/m<sup>3</sup>), PM<sub>2.5</sub> (per IQR, 2.2 µg/m<sup>3</sup>), PM<sub>10</sub> (per IQR, 3.0 µg/m<sup>3</sup>), O<sub>3</sub> (per IQR, 8.4 µg/m<sup>3</sup>)

**Supplementary Table 5: Odds of term small-for-gestational-age (SGA) associated with air pollutants and noise (odds ratios with 95% confidence intervals)**

| Exposure                                              | Unadjusted single-exposure model |         |                   |         | Adjusted single-exposure model |         |
|-------------------------------------------------------|----------------------------------|---------|-------------------|---------|--------------------------------|---------|
|                                                       | N                                | N cases | OR (95% CI)       | p-value | OR (95% CI)                    | p-value |
| <b>NO<sub>2</sub> (per IQR)</b>                       | 471489                           | 44966   | 1.05 (1.04, 1.07) |         | 1.01 (1.00, 1.03)              |         |
| <b>NO<sub>x</sub> (per IQR)</b>                       | 471489                           | 44966   | 1.05 (1.04, 1.07) |         | 1.01 (1.00, 1.03)              |         |
| <b>PM<sub>2.5</sub> traffic-exhaust (per IQR)</b>     | 471489                           | 44966   | 1.07 (1.06, 1.08) |         | 1.02 (1.01, 1.04)              |         |
| <b>PM<sub>2.5</sub> traffic-non-exhaust (per IQR)</b> | 471489                           | 44966   | 1.03 (1.02, 1.05) |         | 1.01 (1.00, 1.02)              |         |
| <b>PM<sub>2.5</sub> (per IQR)</b>                     | 471489                           | 44966   | 1.08 (1.07, 1.10) |         | 1.03 (1.00, 1.06)              |         |
| <b>PM<sub>10</sub> (per IQR)</b>                      | 471489                           | 44966   | 1.07 (1.05, 1.08) |         | 1.01 (0.99, 1.03)              |         |
| <b>O<sub>3</sub> (per IQR)</b>                        | 471489                           | 44966   | 0.96 (0.94, 0.97) |         | 0.99 (0.97, 1.01)              |         |
| <b>Day-time noise, L<sub>Aeq,16hr</sub></b>           |                                  |         |                   |         |                                |         |
| <55dB                                                 | 138696                           | 13113   | Reference         |         | Reference                      |         |
| 55-<60 dB                                             | 232346                           | 22008   | 1.00 (0.98, 1.03) |         | 0.99 (0.97, 1.01)              |         |
| 60-<65 dB                                             | 35334                            | 3458    | 1.04 (1.00, 1.08) |         | 1.02 (0.98, 1.06)              |         |
| ≥65dB                                                 | 65113                            | 6387    | 1.04 (1.01, 1.07) |         | 1.00 (0.97, 1.04)              |         |
| p for trend                                           | 471489                           |         |                   | 0.004   |                                | 0.567   |
| <b>Night-time noise, L<sub>night</sub></b>            |                                  |         |                   |         |                                |         |
| <50dB                                                 | 142880                           | 13406   | Reference         |         | Reference                      |         |
| 50-<55 dB                                             | 224864                           | 21351   | 1.01 (0.99, 1.04) |         | 1.00 (0.98, 1.02)              |         |
| 55-<60 dB                                             | 34960                            | 3433    | 1.05 (1.01, 1.09) |         | 1.03 (0.99, 1.07)              |         |
| 60-<65 dB                                             | 40344                            | 3899    | 1.03 (1.00, 1.07) |         | 1.00 (0.96, 1.04)              |         |
| ≥65dB                                                 | 28441                            | 2877    | 1.09 (1.04, 1.13) |         | 1.03 (0.99, 1.08)              |         |
| p for trend                                           | 471489                           |         |                   | <0.001  |                                | 0.156   |

Adjusted model covariates: maternal age, birth registration type, tobacco expenditure (COA-level), Carstairs quintile (COA-level), season of birth, year (linear term) and random intercept for MSOA. IQR values for air pollutants: NO<sub>2</sub> (per IQR, 8.6 µg/m<sup>3</sup>), NO<sub>x</sub> (per IQR, 23.7 µg/m<sup>3</sup>), PM<sub>2.5</sub> traffic exhaust (per IQR, 0.35 µg/m<sup>3</sup>), PM<sub>2.5</sub> traffic non-exhaust (per IQR, 0.29 µg/m<sup>3</sup>), PM<sub>2.5</sub> (per IQR, 2.2 µg/m<sup>3</sup>), PM<sub>10</sub> (per IQR, 3.0 µg/m<sup>3</sup>), O<sub>3</sub> (per IQR, 8.4 µg/m<sup>3</sup>)

**Supplementary Table 6: Mean difference in term birth weight (g) associated with air pollutants and noise (with 95% confidence intervals)**

| Exposure                                              | Unadjusted single-exposure model |                                     |         | Adjusted single-exposure model      |         |
|-------------------------------------------------------|----------------------------------|-------------------------------------|---------|-------------------------------------|---------|
|                                                       | N                                | Term birth weight (g)<br>MD (95%CI) | p-value | Term birth weight (g)<br>MD (95%CI) | p-value |
| <b>NO<sub>2</sub> (per IQR)</b>                       | 540,365                          | -20.67 (-22.30, -19.04)             |         | -10.97 (-12.98, -8.96)              |         |
| <b>NO<sub>x</sub> (per IQR)</b>                       | 540,365                          | -20.15 (-21.81, -18.49)             |         | -10.74 (-12.76, -8.73)              |         |
| <b>PM<sub>2.5</sub> traffic-exhaust (per IQR)</b>     | 540,365                          | -23.09 (-24.89, -21.29)             |         | -12.43 (-14.51, -10.35)             |         |
| <b>PM<sub>2.5</sub> traffic-non-exhaust (per IQR)</b> | 540,365                          | -17.24 (-18.68, -15.80)             |         | -7.41 (-8.96, -5.86)                |         |
| <b>PM<sub>2.5</sub> (per IQR)</b>                     | 540,365                          | -14.61 (-16.58, -12.65)             |         | -12.94 (-16.41, -9.47)              |         |
| <b>PM<sub>10</sub> (per IQR)</b>                      | 540,365                          | -14.38 (-16.08, -12.69)             |         | -7.27 (-9.84, -4.70)                |         |
| <b>O<sub>3</sub> (per IQR)</b>                        | 540,365                          | 14.53 (12.81, 16.25)                |         | 5.12 (3.11, 7.12)                   |         |
| <b>Day-time noise, L<sub>Aeq,16hr</sub></b>           |                                  |                                     |         |                                     |         |
| <55dB                                                 | 157,491                          | Reference                           |         | Reference                           |         |
| 55-<60 dB                                             | 265,603                          | -3.80 (-6.74, -0.87)                |         | 2.02 (-0.73, 4.78)                  |         |
| 60-<65 dB                                             | 40,755                           | -14.63 (-19.76, -9.49)              |         | -4.70 (-9.39, -0.02)                |         |
| ≥65dB                                                 | 76,516                           | -19.88 (-23.95, -15.81)             |         | -5.23 (-9.00, -1.45)                |         |
| p for trend                                           | 540,365                          |                                     | <0.001  |                                     | 0.001   |
| <b>Night-time noise, L<sub>night</sub></b>            |                                  |                                     |         |                                     |         |
| <50dB                                                 | 162,260                          | Reference                           |         | Reference                           |         |
| 50-<55 dB                                             | 257,045                          | -6.63 (-9.56, -3.70)                |         | 0.08 (-2.67, 2.83)                  |         |
| 55-<60 dB                                             | 40,256                           | -14.62 (-19.76, -9.47)              |         | -4.64 (-9.33, 0.06)                 |         |
| 60-<65 dB                                             | 46,994                           | -17.33 (-22.17, -12.49)             |         | -4.34 (-8.76, 0.09)                 |         |
| ≥65dB                                                 | 33,810                           | -31.65 (-37.17, -26.13)             |         | -12.66 (-17.77, -7.55)              |         |
| p for trend                                           | 540,365                          |                                     | <0.001  |                                     | <0.001  |

Adjusted model covariates: sex, maternal age, birth registration type, tobacco expenditure (COA-level), Carstairs quintile (COA-level), individual-level ethnicity, gestational age as linear and quadratic terms, season of birth, year (linear term) and random intercept for MSOA. IQR values for air pollutants: NO<sub>2</sub> (per IQR, 8.6 µg/m<sup>3</sup>), NO<sub>x</sub> (per IQR, 23.7 µg/m<sup>3</sup>), PM<sub>2.5</sub> traffic exhaust (per IQR, 0.35 µg/m<sup>3</sup>), PM<sub>2.5</sub> traffic non-exhaust (per IQR, 0.29 µg/m<sup>3</sup>), PM<sub>2.5</sub> (per IQR, 2.2 µg/m<sup>3</sup>), PM<sub>10</sub> (per IQR, 3.0 µg/m<sup>3</sup>), O<sub>3</sub> (per IQR, 8.4 µg/m<sup>3</sup>)



**Supplementary Table 7: Joint air-pollutant-noise models: Mean difference (95% CI) in birth weight (g) associated with air pollutants and noise amongst term births**

| <b>Joint air pollutant-noise model*</b>               |          |                         |                |
|-------------------------------------------------------|----------|-------------------------|----------------|
| <b>Term birth weight (g)</b>                          |          |                         |                |
| <b>Exposure</b>                                       | <b>N</b> | <b>MD (95%CI)</b>       | <b>p-value</b> |
| <b><u>Adjusted for night-time noise</u></b>           |          |                         |                |
| <b>NO<sub>2</sub> (per IQR)</b>                       | 540,365  | -10.43 (-12.64, -8.22)  |                |
| <b>NO<sub>x</sub> (per IQR)</b>                       | 540,365  | -10.07 (-12.26, -7.88)  |                |
| <b>PM<sub>2.5</sub> traffic-exhaust (per IQR)</b>     | 540,365  | -12.54 (-14.92, -10.16) |                |
| <b>PM<sub>2.5</sub> traffic-non-exhaust (per IQR)</b> | 540,365  | -7.27 (-9.14, -5.41)    |                |
| <b>PM<sub>2.5</sub> (per IQR)</b>                     | 540,365  | -11.02 (-14.67, -7.37)  |                |
| <b>PM<sub>10</sub> (per IQR)</b>                      | 540,365  | -5.31 (-8.09, -2.52)    |                |
| <b>O<sub>3</sub> (per IQR)</b>                        | 540,365  | 4.41 (2.38, 6.44)       |                |
| <b>Adjusted for NO<sub>2</sub></b>                    |          |                         |                |
| <b>Night-time noise, L<sub>night</sub></b>            |          |                         |                |
| <50dB                                                 | 162260   | Reference               |                |
| 50-<55 dB                                             | 257045   | 1.79 (-0.97, 4.56)      |                |
| 55-<60 dB                                             | 40256    | -1.57 (-6.30, 3.16)     |                |
| 60-<65 dB                                             | 46994    | 0.07 (-4.45, 4.60)      |                |
| ≥65dB                                                 | 33810    | -2.71 (-8.25, 2.83)     |                |
| p for trend                                           | 540365   |                         | 0.330          |
| <b><u>Adjusted for day-time noise</u></b>             |          |                         |                |
| <b>NO<sub>2</sub> (per IQR)</b>                       | 540,365  | -11.06 (-13.22, -8.91)  |                |
| <b>NO<sub>x</sub> (per IQR)</b>                       | 540,365  | -10.70 (-12.84, -8.56)  |                |
| <b>PM<sub>2.5</sub> traffic-exhaust (per IQR)</b>     | 540,365  | -13.14 (-15.44, -10.84) |                |
| <b>PM<sub>2.5</sub> traffic-non-exhaust (per IQR)</b> | 540,365  | -8.01 (-9.82, -6.21)    |                |
| <b>PM<sub>2.5</sub> (per IQR)</b>                     | 540,365  | -12.06 (-15.68, -8.45)  |                |
| <b>PM<sub>10</sub> (per IQR)</b>                      | 540,365  | -6.33 (-9.07, -3.60)    |                |
| <b>O<sub>3</sub> (per IQR)</b>                        | 540,365  | 4.74 (2.72, 6.76)       |                |
| <b>Adjusted for NO<sub>2</sub></b>                    |          |                         |                |
| <b>Day-time noise, L<sub>Aeq,16hr</sub></b>           |          |                         |                |
| <55dB                                                 | 157491   | Reference               |                |
| 55-<60 dB                                             | 265603   | 3.61 (0.85, 6.38)       |                |
| 60-<65 dB                                             | 40755    | -1.53 (-6.25, 3.19)     |                |
| ≥65dB                                                 | 76516    | 1.82 (-2.21, 5.84)      |                |
| p for trend                                           | 540365   |                         | 0.715          |

\*Models are adjusted as follow: sex, maternal age, birth registration type, tobacco expenditure (COA-level), Carstairs quintile (COA-level), individual-level ethnicity, gestational age as linear and quadratic terms, season of birth, year (linear term) and random intercept for MSOA. All air pollution estimates are adjusted for either night-time (L<sub>night</sub>) or daytime noise (L<sub>Aeq,16hr</sub>) as specified in the table, and noise estimates are adjusted for traffic-related air pollution exposure (NO<sub>2</sub>). IQR values for air pollutants: NO<sub>2</sub> (per IQR, 8.6 µg/m<sup>3</sup>), NO<sub>x</sub> (per IQR, 23.7 µg/m<sup>3</sup>), PM<sub>2.5</sub> traffic exhaust (per IQR, 0.35 µg/m<sup>3</sup>), PM<sub>2.5</sub> traffic non-exhaust (per IQR, 0.29 µg/m<sup>3</sup>), PM<sub>2.5</sub> (per IQR, 2.2 µg/m<sup>3</sup>), PM<sub>10</sub> (per IQR, 3.0 µg/m<sup>3</sup>), O<sub>3</sub> (per IQR, 8.4 µg/m<sup>3</sup>)

**Supplementary Table 8: Associations between noise on the continuous scale (per IQR) and odds of LBW and SGA and mean difference in birth weight (g) amongst term births, in unadjusted, adjusted and joint air pollutant-noise models**

| Model                            | N      | Noise                           | Term LBW          |                                                                   |
|----------------------------------|--------|---------------------------------|-------------------|-------------------------------------------------------------------|
|                                  |        |                                 | OR (95% CI)       | Air pollutant OR (95% CI)                                         |
| Unadjusted                       | 540365 | L <sub>night</sub> (per IQR)    | 1.07 (1.05, 1.09) |                                                                   |
| Adjusted*                        | 540365 | L <sub>night</sub> (per IQR)    | 1.01 (0.99, 1.02) |                                                                   |
| Joint air pollutant-noise model* | 540365 | L <sub>night</sub> (per IQR)    | 1.00 (0.99, 1.01) | NO <sub>2</sub> (per IQR) 1.03 (1.00, 1.06)                       |
| Joint air pollutant-noise model* | 540365 | L <sub>night</sub> (per IQR)    | 1.00 (0.99, 1.01) | NO <sub>x</sub> (per IQR) 1.03 (1.00, 1.06)                       |
| Joint air pollutant-noise model* | 540365 | L <sub>night</sub> (per IQR)    | 1.00 (0.98, 1.01) | PM <sub>2.5</sub> traffic-exhaust (per IQR) 1.04 (1.01, 1.08)     |
| Joint air pollutant-noise model* | 540365 | L <sub>night</sub> (per IQR)    | 1.00 (0.98, 1.01) | PM <sub>2.5</sub> traffic-non-exhaust (per IQR) 1.02 (1.00, 1.05) |
| Joint air pollutant-noise model* | 540365 | L <sub>night</sub> (per IQR)    | 1.00 (0.99, 1.02) | PM <sub>2.5</sub> (per IQR) 1.06 (1.01, 1.12)                     |
| Joint air pollutant-noise model* | 540365 | L <sub>night</sub> (per IQR)    | 1.00 (0.99, 1.02) | PM <sub>10</sub> (per IQR) 1.03 (0.99, 1.07)                      |
| Joint air pollutant-noise model* | 540365 | L <sub>night</sub> (per IQR)    | 1.00 (0.99, 1.02) | O <sub>3</sub> (per IQR) 0.96 (0.94, 0.99)                        |
| Unadjusted                       | 540365 | L <sub>Aeq,16hr</sub> (per IQR) | 1.10 (1.08, 1.13) |                                                                   |
| Adjusted*                        | 540365 | L <sub>Aeq,16hr</sub> (per IQR) | 1.01 (0.99, 1.02) |                                                                   |
| Joint air pollutant-noise model* | 540365 | L <sub>Aeq,16hr</sub> (per IQR) | 1.00 (0.99, 1.01) | NO <sub>2</sub> (per IQR) 1.03 (1.00, 1.06)                       |
| Joint air pollutant-noise model* | 540365 | L <sub>Aeq,16hr</sub> (per IQR) | 1.00 (0.99, 1.01) | NO <sub>x</sub> (per IQR) 1.03 (1.00, 1.06)                       |
| Joint air pollutant-noise model* | 540365 | L <sub>Aeq,16hr</sub> (per IQR) | 1.00 (0.98, 1.01) | PM <sub>2.5</sub> traffic-exhaust (per IQR) 1.04 (1.01, 1.08)     |
| Joint air pollutant-noise model* | 540365 | L <sub>Aeq,16hr</sub> (per IQR) | 1.00 (0.99, 1.01) | PM <sub>2.5</sub> traffic-non-exhaust (per IQR) 1.02 (1.00, 1.05) |
| Joint air pollutant-noise model* | 540365 | L <sub>Aeq,16hr</sub> (per IQR) | 1.00 (0.99, 1.01) | PM <sub>2.5</sub> (per IQR) 1.06 (1.01, 1.12)                     |
| Joint air pollutant-noise model* | 540365 | L <sub>Aeq,16hr</sub> (per IQR) | 1.00 (0.99, 1.02) | PM <sub>10</sub> (per IQR) 1.03 (0.99, 1.07)                      |
| Joint air pollutant-noise model* | 540365 | L <sub>Aeq,16hr</sub> (per IQR) | 1.00 (0.99, 1.02) | O <sub>3</sub> (per IQR) 0.96 (0.94, 0.99)                        |
| Model                            | N      | Noise                           | Term SGA          |                                                                   |
|                                  |        |                                 | OR (95% CI)       | Air pollutant OR (95% CI)                                         |
| Unadjusted                       | 471489 | L <sub>night</sub> (per IQR)    | 1.01 (1.01, 1.02) |                                                                   |
| Adjusted*                        | 471489 | L <sub>night</sub> (per IQR)    | 1.01 (1.00, 1.01) |                                                                   |
| Joint air pollutant-noise model* | 471489 | L <sub>night</sub> (per IQR)    | 1.00 (1.00, 1.01) | NO <sub>2</sub> (per IQR) 1.01 (0.99, 1.03)                       |
| Joint air pollutant-noise model* | 471489 | L <sub>night</sub> (per IQR)    | 1.00 (1.00, 1.01) | NO <sub>x</sub> (per IQR) 1.01 (1.00, 1.03)                       |
| Joint air pollutant-noise model* | 471489 | L <sub>night</sub> (per IQR)    | 1.00 (0.99, 1.01) | PM <sub>2.5</sub> traffic-exhaust (per IQR) 1.02 (1.00, 1.04)     |
| Joint air pollutant-noise model* | 471489 | L <sub>night</sub> (per IQR)    | 1.00 (0.99, 1.01) | PM <sub>2.5</sub> traffic-non-exhaust (per IQR) 1.01 (0.99, 1.02) |
| Joint air pollutant-noise model* | 471489 | L <sub>night</sub> (per IQR)    | 1.00 (1.00, 1.01) | PM <sub>2.5</sub> (per IQR) 1.03 (1.00, 1.06)                     |
| Joint air pollutant-noise model* | 471489 | L <sub>night</sub> (per IQR)    | 1.00 (1.00, 1.01) | PM <sub>10</sub> (per IQR) 1.00 (0.98, 1.03)                      |
| Joint air pollutant-noise model* | 471489 | L <sub>night</sub> (per IQR)    | 1.00 (1.00, 1.01) | O <sub>3</sub> (per IQR) 0.99 (0.98, 1.01)                        |

| Model                            | N      | Noise                           | Term SGA          |                                                 |                   |
|----------------------------------|--------|---------------------------------|-------------------|-------------------------------------------------|-------------------|
|                                  |        |                                 | OR (95% CI)       | Air pollutant                                   | OR (95% CI)       |
| Unadjusted                       | 471489 | L <sub>Aeq,16hr</sub> (per IQR) | 1.01 (1.01, 1.02) |                                                 |                   |
| Adjusted*                        | 471489 | L <sub>Aeq,16hr</sub> (per IQR) | 1.00 (1.00, 1.01) |                                                 |                   |
| Joint air pollutant-noise model* | 471489 | L <sub>Aeq,16hr</sub> (per IQR) | 1.00 (1.00, 1.01) | NO <sub>2</sub> (per IQR)                       | 1.01 (0.99, 1.03) |
| Joint air pollutant-noise model* | 471489 | L <sub>Aeq,16hr</sub> (per IQR) | 1.00 (1.00, 1.01) | NO <sub>x</sub> (per IQR)                       | 1.01 (1.00, 1.03) |
| Joint air pollutant-noise model* | 471489 | L <sub>Aeq,16hr</sub> (per IQR) | 1.00 (0.99, 1.01) | PM <sub>2.5</sub> traffic-exhaust (per IQR)     | 1.02 (1.00, 1.04) |
| Joint air pollutant-noise model* | 471489 | L <sub>Aeq,16hr</sub> (per IQR) | 1.00 (0.99, 1.01) | PM <sub>2.5</sub> traffic-non-exhaust (per IQR) | 1.01 (0.99, 1.02) |
| Joint air pollutant-noise model* | 471489 | L <sub>Aeq,16hr</sub> (per IQR) | 1.00 (1.00, 1.01) | PM <sub>2.5</sub> (per IQR)                     | 1.03 (1.00, 1.06) |
| Joint air pollutant-noise model* | 471489 | L <sub>Aeq,16hr</sub> (per IQR) | 1.00 (1.00, 1.01) | PM <sub>10</sub> (per IQR)                      | 1.00 (0.98, 1.03) |
| Joint air pollutant-noise model* | 471489 | L <sub>Aeq,16hr</sub> (per IQR) | 1.00 (1.00, 1.01) | O <sub>3</sub> (per IQR)                        | 0.99 (0.98, 1.01) |

  

| Model                            | N      | Noise                           | Term birth weight (g) |                                                 |                         |
|----------------------------------|--------|---------------------------------|-----------------------|-------------------------------------------------|-------------------------|
|                                  |        |                                 | MD (95%CI)            | Air pollutant                                   | MD (95%CI)              |
| Unadjusted                       | 540365 | L <sub>night</sub> (per IQR)    | -5.74 (-6.66, -4.83)  |                                                 |                         |
| Adjusted*                        | 540365 | L <sub>night</sub> (per IQR)    | -2.24 (-3.08, -1.40)  |                                                 |                         |
| Joint air pollutant-noise model* | 540365 | L <sub>night</sub> (per IQR)    | -0.54 (-1.46, 0.38)   | NO <sub>2</sub> (per IQR)                       | -10.45 (-12.64, -8.25)  |
| Joint air pollutant-noise model* | 540365 | L <sub>night</sub> (per IQR)    | -0.69 (-1.60, 0.22)   | NO <sub>x</sub> (per IQR)                       | -10.10 (-12.28, -7.92)  |
| Joint air pollutant-noise model* | 540365 | L <sub>night</sub> (per IQR)    | 0.15 (-0.81, 1.10)    | PM <sub>2.5</sub> traffic-exhaust (per IQR)     | -12.61 (-14.98, -10.24) |
| Joint air pollutant-noise model* | 540365 | L <sub>night</sub> (per IQR)    | -0.04 (-1.05, 0.97)   | PM <sub>2.5</sub> traffic-non-exhaust (per IQR) | -7.37 (-9.23, -5.50)    |
| Joint air pollutant-noise model* | 540365 | L <sub>night</sub> (per IQR)    | -1.45 (-2.33, -0.56)  | PM <sub>2.5</sub> (per IQR)                     | -11.12 (-14.76, -7.47)  |
| Joint air pollutant-noise model* | 540365 | L <sub>night</sub> (per IQR)    | -1.59 (-2.50, -0.68)  | PM <sub>10</sub> (per IQR)                      | -5.41 (-8.19, -2.63)    |
| Joint air pollutant-noise model* | 540365 | L <sub>night</sub> (per IQR)    | -1.98 (-2.83, -1.13)  | O <sub>3</sub> (per IQR)                        | 4.43 (2.41, 6.46)       |
| Unadjusted                       | 540365 | L <sub>Aeq,16hr</sub> (per IQR) | -5.13 (-5.98, -4.27)  |                                                 |                         |
| Adjusted*                        | 540365 | L <sub>Aeq,16hr</sub> (per IQR) | -2.02 (-2.81, -1.23)  |                                                 |                         |
| Joint air pollutant-noise model* | 540365 | L <sub>Aeq,16hr</sub> (per IQR) | -0.44 (-1.30, 0.41)   | NO <sub>2</sub> (per IQR)                       | -10.52 (-12.71, -8.33)  |
| Joint air pollutant-noise model* | 540365 | L <sub>Aeq,16hr</sub> (per IQR) | -0.58 (-1.43, 0.27)   | NO <sub>x</sub> (per IQR)                       | -10.18 (-12.35, -8.00)  |
| Joint air pollutant-noise model* | 540365 | L <sub>Aeq,16hr</sub> (per IQR) | 0.20 (-0.69, 1.09)    | PM <sub>2.5</sub> traffic-exhaust (per IQR)     | -12.68 (-15.04, -10.32) |
| Joint air pollutant-noise model* | 540365 | L <sub>Aeq,16hr</sub> (per IQR) | 0.05 (-0.90, 0.99)    | PM <sub>2.5</sub> traffic-non-exhaust (per IQR) | -7.46 (-9.32, -5.61)    |
| Joint air pollutant-noise model* | 540365 | L <sub>Aeq,16hr</sub> (per IQR) | -1.28 (-2.11, -0.46)  | PM <sub>2.5</sub> (per IQR)                     | -11.24 (-14.88, -7.60)  |
| Joint air pollutant-noise model* | 540365 | L <sub>Aeq,16hr</sub> (per IQR) | -1.40 (-2.25, -0.56)  | PM <sub>10</sub> (per IQR)                      | -5.54 (-8.31, -2.76)    |
| Joint air pollutant-noise model* | 540365 | L <sub>Aeq,16hr</sub> (per IQR) | -1.78 (-2.58, -0.98)  | O <sub>3</sub> (per IQR)                        | 4.48 (2.45, 6.50)       |

\*Models are adjusted as follows. Term LBW: sex, maternal age, birth registration type, tobacco expenditure (COA-level), Carstairs quintile (COA-level), individual-level ethnicity, gestational age as linear and quadratic terms, season of birth, year (linear term) and random intercept for MSOA. Term SGA: maternal age, birth registration type, tobacco expenditure (COA-level), Carstairs quintile (COA-level), season of birth, year

(linear term) and random intercept for MSOA. Term birth weight: sex, maternal age, birth registration type, tobacco expenditure (COA-level), Carstairs quintile (COA-level), individual-level ethnicity, gestational age as linear and quadratic terms, season of birth, year (linear term) and random intercept for MSOA. \*\*Joint air pollutant-noise models are additionally adjusted for the air pollutant stated in the table above. IQR values for noise and air pollutants:  $L_{\text{night}}$  (per IQR, 3.9 dB),  $L_{\text{Aeq,16hr}}$  (per IQR, 3.5 dB),  $\text{NO}_2$  (per IQR,  $8.6 \mu\text{g}/\text{m}^3$ ),  $\text{NO}_x$  (per IQR,  $23.7 \mu\text{g}/\text{m}^3$ ),  $\text{PM}_{2.5}$  traffic exhaust (per IQR,  $0.35 \mu\text{g}/\text{m}^3$ ),  $\text{PM}_{2.5}$  traffic non-exhaust (per IQR,  $0.29 \mu\text{g}/\text{m}^3$ ),  $\text{PM}_{2.5}$  (per IQR,  $2.2 \mu\text{g}/\text{m}^3$ ),  $\text{PM}_{10}$  (per IQR,  $3.0 \mu\text{g}/\text{m}^3$ ),  $\text{O}_3$  (per IQR,  $8.4 \mu\text{g}/\text{m}^3$ ).

**Supplementary Table 9: Joint air-pollutant-noise models: Adjusted OR (95%CI) for LBW and SGA, and mean difference (95% CI) in birth weight (g) associated with noise amongst term births, after adjustment for each air pollutant**

| Exposure                           | Joint air pollutant-noise model*<br>Term LBW |                   |         | Joint air pollutant-noise model*<br>Term SGA |                   |         | Joint air pollutant-noise model*<br>Term birth weight (g) |                     |         |
|------------------------------------|----------------------------------------------|-------------------|---------|----------------------------------------------|-------------------|---------|-----------------------------------------------------------|---------------------|---------|
|                                    | N                                            | OR (95% CI)       | p-value | N                                            | OR (95% CI)       | p-value | N                                                         | MD (95%CI)          | p-value |
| <b>Adjusted for NO<sub>2</sub></b> |                                              |                   |         |                                              |                   |         |                                                           |                     |         |
| <b>L<sub>Aeq,16hr</sub></b>        |                                              |                   |         |                                              |                   |         |                                                           |                     |         |
| <55dB                              | 157491                                       | Reference         |         | 138696                                       | Reference         |         | 157491                                                    | Reference           |         |
| 55-<60 dB                          | 265603                                       | 0.97 (0.93, 1.02) |         | 232346                                       | 0.99 (0.96, 1.01) |         | 265603                                                    | 3.61 (0.85, 6.38)   |         |
| 60-<65 dB                          | 40755                                        | 1.01 (0.94, 1.09) |         | 35334                                        | 1.01 (0.97, 1.05) |         | 40755                                                     | -1.53 (-6.25, 3.19) |         |
| ≥65dB                              | 76516                                        | 0.98 (0.93, 1.05) |         | 65113                                        | 0.99 (0.96, 1.03) |         | 76516                                                     | 1.82 (-2.21, 5.84)  |         |
| p for trend                        | 540365                                       |                   | 0.802   | 471489                                       |                   | 0.957   | 540365                                                    |                     | 0.715   |
| <b>L<sub>night</sub></b>           |                                              |                   |         |                                              |                   |         |                                                           |                     |         |
| <50dB                              | 162260                                       | Reference         |         | 142880                                       | Reference         |         | 162260                                                    | Reference           |         |
| 50-<55 dB                          | 257045                                       | 0.98 (0.94, 1.03) |         | 224864                                       | 1.00 (0.97, 1.02) |         | 257045                                                    | 1.79 (-0.97, 4.56)  |         |
| 55-<60 dB                          | 40256                                        | 1.00 (0.93, 1.07) |         | 34960                                        | 1.02 (0.98, 1.06) |         | 40256                                                     | -1.57 (-6.30, 3.16) |         |
| 60-<65 dB                          | 46994                                        | 1.00 (0.94, 1.08) |         | 40344                                        | 1.00 (0.96, 1.04) |         | 46994                                                     | 0.07 (-4.45, 4.60)  |         |
| ≥65dB                              | 33810                                        | 0.99 (0.91, 1.08) |         | 28441                                        | 1.02 (0.97, 1.07) |         | 33810                                                     | -2.71 (-8.25, 2.83) |         |
| p for trend                        | 540365                                       |                   | 0.962   | 471489                                       |                   | 0.432   | 540365                                                    |                     | 0.330   |
| <b>Adjusted for NO<sub>x</sub></b> |                                              |                   |         |                                              |                   |         |                                                           |                     |         |
| <b>L<sub>Aeq,16hr</sub></b>        |                                              |                   |         |                                              |                   |         |                                                           |                     |         |
| <55dB                              | 157491                                       | Reference         |         | 138696                                       | Reference         |         | 157491                                                    | Reference           |         |
| 55-<60 dB                          | 265603                                       | 0.97 (0.93, 1.02) |         | 232346                                       | 0.99 (0.97, 1.01) |         | 265603                                                    | 3.42 (0.66, 6.18)   |         |
| 60-<65 dB                          | 40755                                        | 1.01 (0.94, 1.09) |         | 35334                                        | 1.01 (0.97, 1.05) |         | 40755                                                     | -1.90 (-6.62, 2.81) |         |
| ≥65dB                              | 76516                                        | 0.98 (0.93, 1.05) |         | 65113                                        | 0.99 (0.96, 1.03) |         | 76516                                                     | 1.14 (-2.85, 5.13)  |         |
| p for trend                        | 540365                                       |                   | 0.800   | 471489                                       |                   | 0.977   | 540365                                                    |                     | 0.976   |
| <b>L<sub>night</sub></b>           |                                              |                   |         |                                              |                   |         |                                                           |                     |         |
| <50dB                              | 162260                                       | Reference         |         | 142880                                       | Reference         |         | 162260                                                    | Reference           |         |
| 50-<55 dB                          | 257045                                       | 0.98 (0.94, 1.03) |         | 224864                                       | 1.00 (0.97, 1.02) |         | 257045                                                    | 1.60 (-1.17, 4.36)  |         |
| 55-<60 dB                          | 40256                                        | 1.00 (0.93, 1.07) |         | 34960                                        | 1.02 (0.98, 1.06) |         | 40256                                                     | -1.92 (-6.65, 2.80) |         |
| 60-<65 dB                          | 46994                                        | 1.01 (0.94, 1.08) |         | 40344                                        | 1.00 (0.96, 1.04) |         | 46994                                                     | -0.42 (-4.93, 4.08) |         |
| ≥65dB                              | 33810                                        | 0.99 (0.91, 1.07) |         | 28441                                        | 1.02 (0.97, 1.07) |         | 33810                                                     | -3.56 (-9.05, 1.93) |         |
| p for trend                        | 540365                                       |                   | 0.969   | 471489                                       |                   | 0.421   | 540365                                                    |                     | 0.187   |

| Exposure                                                 | Joint air pollutant-noise model*<br>Term LBW |                   |         | Joint air pollutant-noise model*<br>Term SGA |                   |         | Joint air pollutant-noise model*<br>Term birth weight (g) |                     |         |
|----------------------------------------------------------|----------------------------------------------|-------------------|---------|----------------------------------------------|-------------------|---------|-----------------------------------------------------------|---------------------|---------|
|                                                          | N                                            | OR (95% CI)       | p-value | N                                            | OR (95% CI)       | p-value | N                                                         | MD (95%CI)          | p-value |
| <b>Adjusted for PM<sub>2.5</sub> traffic-exhaust</b>     |                                              |                   |         |                                              |                   |         |                                                           |                     |         |
| <b>L<sub>Aeq,16hr</sub></b>                              |                                              |                   |         |                                              |                   |         |                                                           |                     |         |
| <55dB                                                    | 157491                                       | Reference         |         | 138696                                       | Reference         |         | 157491                                                    | Reference           |         |
| 55-<60 dB                                                | 265603                                       | 0.97 (0.93, 1.01) |         | 232346                                       | 0.99 (0.96, 1.01) |         | 265603                                                    | 3.95 (1.18, 6.71)   |         |
| 60-<65 dB                                                | 40755                                        | 1.01 (0.94, 1.08) |         | 35334                                        | 1.01 (0.97, 1.05) |         | 40755                                                     | -0.45 (-5.19, 4.29) |         |
| ≥65dB                                                    | 76516                                        | 0.97 (0.91, 1.04) |         | 65113                                        | 0.99 (0.95, 1.02) |         | 76516                                                     | 4.35 (0.21, 8.49)   |         |
| p for trend                                              | 540365                                       |                   | 0.535   | 471489                                       |                   | 0.581   | 540365                                                    |                     | 0.113   |
| <b>L<sub>night</sub></b>                                 |                                              |                   |         |                                              |                   |         |                                                           |                     |         |
| <50dB                                                    | 162260                                       | Reference         |         | 142880                                       | Reference         |         | 162260                                                    | Reference           |         |
| 50-<55 dB                                                | 257045                                       | 0.98 (0.94, 1.02) |         | 224864                                       | 0.99 (0.97, 1.02) |         | 257045                                                    | 2.15 (-0.62, 4.92)  |         |
| 55-<60 dB                                                | 40256                                        | 0.99 (0.92, 1.07) |         | 34960                                        | 1.02 (0.98, 1.06) |         | 40256                                                     | -0.54 (-5.29, 4.21) |         |
| 60-<65 dB                                                | 46994                                        | 1.00 (0.93, 1.07) |         | 40344                                        | 0.99 (0.95, 1.03) |         | 46994                                                     | 1.71 (-2.86, 6.29)  |         |
| ≥65dB                                                    | 33810                                        | 0.97 (0.89, 1.06) |         | 28441                                        | 1.01 (0.96, 1.06) |         | 33810                                                     | 0.97 (-4.77, 6.71)  |         |
| p for trend                                              | 540365                                       |                   | 0.715   | 471489                                       |                   | 0.803   | 540365                                                    |                     | 0.726   |
| <b>Adjusted for PM<sub>2.5</sub> traffic non-exhaust</b> |                                              |                   |         |                                              |                   |         |                                                           |                     |         |
| <b>L<sub>Aeq,16hr</sub></b>                              |                                              |                   |         |                                              |                   |         |                                                           |                     |         |
| <55dB                                                    | 157491                                       | Reference         |         | 138696                                       | Reference         |         | 157491                                                    | Reference           |         |
| 55-<60 dB                                                | 265603                                       | 0.97 (0.93, 1.01) |         | 232346                                       | 0.99 (0.96, 1.01) |         | 265603                                                    | 3.89 (1.11, 6.67)   |         |
| 60-<65 dB                                                | 40755                                        | 1.01 (0.94, 1.08) |         | 35334                                        | 1.01 (0.97, 1.05) |         | 40755                                                     | -0.44 (-5.22, 4.34) |         |
| ≥65dB                                                    | 76516                                        | 0.98 (0.92, 1.04) |         | 65113                                        | 0.99 (0.96, 1.03) |         | 76516                                                     | 4.26 (-0.09, 8.60)  |         |
| p for trend                                              | 540365                                       |                   | 0.639   | 471489                                       |                   | 0.862   | 540365                                                    |                     | 0.135   |
| <b>L<sub>night</sub></b>                                 |                                              |                   |         |                                              |                   |         |                                                           |                     |         |
| <50dB                                                    | 162260                                       | Reference         |         | 142880                                       | Reference         |         | 162260                                                    | Reference           |         |
| 50-<55 dB                                                | 257045                                       | 0.98 (0.94, 1.03) |         | 224864                                       | 1.00 (0.97, 1.02) |         | 257045                                                    | 1.93 (-0.86, 4.72)  |         |
| 55-<60 dB                                                | 40256                                        | 1.00 (0.93, 1.07) |         | 34960                                        | 1.02 (0.98, 1.07) |         | 40256                                                     | -0.79 (-5.58, 4.01) |         |
| 60-<65 dB                                                | 46994                                        | 1.00 (0.93, 1.07) |         | 40344                                        | 1.00 (0.96, 1.04) |         | 46994                                                     | 1.81 (-2.90, 6.51)  |         |
| ≥65dB                                                    | 33810                                        | 0.98 (0.90, 1.08) |         | 28441                                        | 1.02 (0.97, 1.08) |         | 33810                                                     | -0.65 (-6.64, 5.34) |         |
| p for trend                                              | 540365                                       |                   | 0.883   | 471489                                       |                   | 0.454   | 540365                                                    |                     | 0.965   |

| Exposure                             | Joint air pollutant-noise model* |                         |         | Joint air pollutant-noise model* |                         |         | Joint air pollutant-noise model* |                                     |         |
|--------------------------------------|----------------------------------|-------------------------|---------|----------------------------------|-------------------------|---------|----------------------------------|-------------------------------------|---------|
|                                      | N                                | Term LBW<br>OR (95% CI) | p-value | N                                | Term SGA<br>OR (95% CI) | p-value | N                                | Term birth weight (g)<br>MD (95%CI) | p-value |
| <b>Adjusted for PM<sub>2.5</sub></b> |                                  |                         |         |                                  |                         |         |                                  |                                     |         |
| <b>L<sub>Aeq,16hr</sub></b>          |                                  |                         |         |                                  |                         |         |                                  |                                     |         |
| <55dB                                | 157491                           | Reference               |         | 138696                           | Reference               |         | 157491                           | Reference                           |         |
| 55-<60 dB                            | 265603                           | 0.97 (0.94, 1.02)       |         | 232346                           | 0.99 (0.97, 1.01)       |         | 265603                           | 2.75 (-0.01, 5.50)                  |         |
| 60-<65 dB                            | 40755                            | 1.01 (0.94, 1.09)       |         | 35334                            | 1.01 (0.97, 1.05)       |         | 40755                            | -3.17 (-7.88, 1.53)                 |         |
| ≥65dB                                | 76516                            | 0.99 (0.93, 1.05)       |         | 65113                            | 0.99 (0.96, 1.03)       |         | 76516                            | -1.85 (-5.76, 2.06)                 |         |
| p for trend                          | 540365                           |                         | 0.886   | 471489                           |                         | 0.952   | 540365                           |                                     | 0.142   |
| <b>L<sub>night</sub></b>             |                                  |                         |         |                                  |                         |         |                                  |                                     |         |
| <50dB                                | 162260                           | Reference               |         | 142880                           | Reference               |         | 162260                           | Reference                           |         |
| 50-<55 dB                            | 257045                           | 0.99 (0.95, 1.03)       |         | 224864                           | 1.00 (0.97, 1.02)       |         | 257045                           | 0.82 (-1.94, 3.58)                  |         |
| 55-<60 dB                            | 40256                            | 1.00 (0.93, 1.08)       |         | 34960                            | 1.02 (0.98, 1.06)       |         | 40256                            | -3.20 (-7.92, 1.51)                 |         |
| 60-<65 dB                            | 46994                            | 1.01 (0.94, 1.08)       |         | 40344                            | 1.00 (0.96, 1.04)       |         | 46994                            | -2.22 (-6.70, 2.26)                 |         |
| ≥65dB                                | 33810                            | 1.00 (0.92, 1.08)       |         | 28441                            | 1.02 (0.97, 1.07)       |         | 33810                            | -8.15 (-13.48, -2.83)               |         |
| p for trend                          | 540365                           |                         | 0.869   | 471489                           |                         | 0.448   | 540365                           |                                     | 0.003   |
| <b>Adjusted for PM<sub>10</sub></b>  |                                  |                         |         |                                  |                         |         |                                  |                                     |         |
| <b>L<sub>Aeq,16hr</sub></b>          |                                  |                         |         |                                  |                         |         |                                  |                                     |         |
| <55dB                                | 157491                           | Reference               |         | 138696                           | Reference               |         | 157491                           | Reference                           |         |
| 55-<60 dB                            | 265603                           | 0.98 (0.94, 1.02)       |         | 232346                           | 0.99 (0.97, 1.01)       |         | 265603                           | 2.62 (-0.14, 5.39)                  |         |
| 60-<65 dB                            | 40755                            | 1.02 (0.95, 1.09)       |         | 35334                            | 1.01 (0.97, 1.05)       |         | 40755                            | -3.36 (-8.08, 1.36)                 |         |
| ≥65dB                                | 76516                            | 0.99 (0.93, 1.05)       |         | 65113                            | 1.00 (0.97, 1.04)       |         | 76516                            | -2.24 (-6.24, 1.76)                 |         |
| p for trend                          | 540365                           |                         | 1.000   | 471489                           |                         | 0.750   | 540365                           |                                     | 0.108   |
| <b>L<sub>night</sub></b>             |                                  |                         |         |                                  |                         |         |                                  |                                     |         |
| <50dB                                | 162260                           | Reference               |         | 142880                           | Reference               |         | 162260                           | Reference                           |         |
| 50-<55 dB                            | 257045                           | 0.99 (0.95, 1.03)       |         | 224864                           | 1.00 (0.98, 1.02)       |         | 257045                           | 0.64 (-2.13, 3.41)                  |         |
| 55-<60 dB                            | 40256                            | 1.00 (0.93, 1.08)       |         | 34960                            | 1.03 (0.99, 1.07)       |         | 40256                            | -3.50 (-8.23, 1.23)                 |         |
| 60-<65 dB                            | 46994                            | 1.01 (0.94, 1.08)       |         | 40344                            | 1.00 (0.96, 1.04)       |         | 46994                            | -2.60 (-7.12, 1.92)                 |         |
| ≥65dB                                | 33810                            | 1.00 (0.93, 1.09)       |         | 28441                            | 1.03 (0.98, 1.08)       |         | 33810                            | -9.05 (-14.51, -3.59)               |         |
| p for trend                          | 540365                           |                         | 0.735   | 471489                           |                         | 0.227   | 540365                           |                                     | 0.001   |

| Exposure                          | Joint air pollutant-noise model* |                         |         | Joint air pollutant-noise model* |                         |         | Joint air pollutant-noise model* |                                     |         |
|-----------------------------------|----------------------------------|-------------------------|---------|----------------------------------|-------------------------|---------|----------------------------------|-------------------------------------|---------|
|                                   | N                                | Term LBW<br>OR (95% CI) | p-value | N                                | Term SGA<br>OR (95% CI) | p-value | N                                | Term birth weight (g)<br>MD (95%CI) | p-value |
| <b>Adjusted for O<sub>3</sub></b> |                                  |                         |         |                                  |                         |         |                                  |                                     |         |
| <b>L<sub>Aeq,16hr</sub></b>       |                                  |                         |         |                                  |                         |         |                                  |                                     |         |
| <55dB                             | 157491                           | Reference               |         | 138696                           | Reference               |         | 157491                           | Reference                           |         |
| 55-<60 dB                         | 265603                           | 0.98 (0.94, 1.02)       |         | 232346                           | 0.99 (0.97, 1.01)       |         | 265603                           | 2.31 (-0.44, 5.07)                  |         |
| 60-<65 dB                         | 40755                            | 1.02 (0.95, 1.09)       |         | 35334                            | 1.01 (0.97, 1.06)       |         | 40755                            | -4.19 (-8.88, 0.49)                 |         |
| ≥65dB                             | 76516                            | 1.00 (0.94, 1.06)       |         | 65113                            | 1.00 (0.97, 1.04)       |         | 76516                            | -4.12 (-7.92, -0.31)                |         |
| p for trend                       | 540365                           |                         | 0.865   | 471489                           |                         | 0.670   | 540365                           |                                     | 0.007   |
| <b>L<sub>night</sub></b>          |                                  |                         |         |                                  |                         |         |                                  |                                     |         |
| <50dB                             | 162260                           | Reference               |         | 142880                           | Reference               |         | 162260                           | Reference                           |         |
| 50-<55 dB                         | 257045                           | 0.99 (0.95, 1.03)       |         | 224864                           | 1.00 (0.97, 1.02)       |         | 257045                           | 0.40 (-2.36, 3.15)                  |         |
| 55-<60 dB                         | 40256                            | 1.01 (0.94, 1.08)       |         | 34960                            | 1.03 (0.98, 1.07)       |         | 40256                            | -4.14 (-8.83, 0.56)                 |         |
| 60-<65 dB                         | 46994                            | 1.01 (0.95, 1.08)       |         | 40344                            | 1.00 (0.96, 1.04)       |         | 46994                            | -3.64 (-8.07, 0.80)                 |         |
| ≥65dB                             | 33810                            | 1.01 (0.93, 1.09)       |         | 28441                            | 1.03 (0.99, 1.08)       |         | 33810                            | -11.09 (-16.25, -5.93)              |         |
| p for trend                       | 540365                           |                         | 0.622   | 471489                           |                         | 0.205   | 540365                           |                                     | <0.001  |

\*Models are adjusted as follows. Term LBW: sex, maternal age, birth registration type, tobacco expenditure (COA-level), Carstairs quintile (COA-level), individual-level ethnicity, gestational age as linear and quadratic terms, season of birth, year (linear term) and random intercept for MSOA. Term SGA: maternal age, birth registration type, tobacco expenditure (COA-level), Carstairs quintile (COA-level), season of birth, year (linear term) and random intercept for MSOA. Term birth weight: sex, maternal age, birth registration type, tobacco expenditure (COA-level), Carstairs quintile (COA-level), individual-level ethnicity, gestational age as linear and quadratic terms, season of birth, year (linear term) and random intercept for MSOA. All models are additionally adjusted for the air pollutant stated in the table above.



**Supplementary Table 10: Adjusted\* odds of term LBW and term SGA associated with trimester-specific air pollutant exposures (models adjusted for road traffic noise co-exposure)**

(To allow comparison between trimesters for a given pollutant we present analyses per specific  $\mu\text{g}/\text{m}^3$  increments, as the IQR varied between pregnancy and trimester-specific averages).

| <b>Exposure</b>                                                                         | <b>Exposure window</b> | <b>Term LBW<br/>OR (95% CI)</b> | <b>Term SGA<br/>OR (95% CI)</b> |
|-----------------------------------------------------------------------------------------|------------------------|---------------------------------|---------------------------------|
| <b>NO<sub>2</sub> (per 10 <math>\mu\text{g}/\text{m}^3</math>)</b>                      | <b>Pregnancy</b>       | 1.04 (1.00, 1.07)               | 1.01 (0.99, 1.03)               |
|                                                                                         | <b>Trimester 1</b>     | 1.01 (0.98, 1.03)               | 1.01 (1.00, 1.03)               |
|                                                                                         | <b>Trimester 2</b>     | 1.03 (1.00, 1.05)               | 1.01 (1.00, 1.03)               |
|                                                                                         | <b>Trimester 3</b>     | 1.03 (1.00, 1.05)               | 1.00 (0.99, 1.02)               |
| <b>NO<sub>x</sub> (per 20 <math>\mu\text{g}/\text{m}^3</math>)</b>                      | <b>Pregnancy</b>       | 1.03 (1.00, 1.05)               | 1.01 (1.00, 1.02)               |
|                                                                                         | <b>Trimester 1</b>     | 1.01 (0.99, 1.03)               | 1.01 (1.00, 1.02)               |
|                                                                                         | <b>Trimester 2</b>     | 1.02 (1.00, 1.04)               | 1.01 (1.00, 1.02)               |
|                                                                                         | <b>Trimester 3</b>     | 1.02 (1.00, 1.04)               | 1.00 (0.99, 1.01)               |
| <b>PM<sub>2.5</sub> traffic-exhaust (per 1 <math>\mu\text{g}/\text{m}^3</math>)</b>     | <b>Pregnancy</b>       | 1.13 (1.03, 1.23)               | 1.06 (1.01, 1.12)               |
|                                                                                         | <b>Trimester 1</b>     | 1.07 (0.99, 1.15)               | 1.05 (1.01, 1.10)               |
|                                                                                         | <b>Trimester 2</b>     | 1.11 (1.03, 1.19)               | 1.05 (1.01, 1.10)               |
|                                                                                         | <b>Trimester 3</b>     | 1.10 (1.02, 1.19)               | 1.02 (0.98, 1.07)               |
| <b>PM<sub>2.5</sub> traffic-non-exhaust (per 1 <math>\mu\text{g}/\text{m}^3</math>)</b> | <b>Pregnancy</b>       | 1.08 (0.99, 1.18)               | 1.02 (0.97, 1.08)               |
|                                                                                         | <b>Trimester 1</b>     | 1.03 (0.96, 1.11)               | 1.03 (0.98, 1.07)               |
|                                                                                         | <b>Trimester 2</b>     | 1.07 (1.00, 1.16)               | 1.03 (0.98, 1.07)               |
|                                                                                         | <b>Trimester 3</b>     | 1.06 (0.98, 1.14)               | 1.00 (0.95, 1.04)               |
| <b>PM<sub>2.5</sub> (per 5 <math>\mu\text{g}/\text{m}^3</math>)</b>                     | <b>Pregnancy</b>       | 1.15 (1.02, 1.30)               | 1.07 (1.00, 1.15)               |
|                                                                                         | <b>Trimester 1</b>     | 1.02 (0.97, 1.07)               | 1.03 (1.00, 1.06)               |
|                                                                                         | <b>Trimester 2</b>     | 1.01 (0.96, 1.06)               | 1.01 (0.98, 1.04)               |
|                                                                                         | <b>Trimester 3</b>     | 1.05 (1.00, 1.10)               | 0.99 (0.97, 1.02)               |
| <b>PM<sub>10</sub> (per 10 <math>\mu\text{g}/\text{m}^3</math>)</b>                     | <b>Pregnancy</b>       | 1.09 (0.96, 1.25)               | 1.01 (0.94, 1.09)               |
|                                                                                         | <b>Trimester 1</b>     | 1.03 (0.95, 1.11)               | 1.04 (0.99, 1.08)               |
|                                                                                         | <b>Trimester 2</b>     | 1.01 (0.94, 1.08)               | 1.00 (0.96, 1.04)               |
|                                                                                         | <b>Trimester 3</b>     | 1.04 (0.98, 1.11)               | 0.98 (0.94, 1.02)               |
| <b>O<sub>3</sub> (per 10 <math>\mu\text{g}/\text{m}^3</math>)</b>                       | <b>Pregnancy</b>       | 0.96 (0.92, 0.99)               | 0.99 (0.97, 1.01)               |
|                                                                                         | <b>Trimester 1</b>     | 0.99 (0.96, 1.01)               | 0.99 (0.97, 1.00)               |
|                                                                                         | <b>Trimester 2</b>     | 0.97 (0.95, 0.99)               | 1.00 (0.98, 1.01)               |
|                                                                                         | <b>Trimester 3</b>     | 0.98 (0.96, 1.01)               | 1.00 (0.99, 1.02)               |

\*Term low birth weight models adjusted for: sex, maternal age, birth registration type, tobacco expenditure (COA-level), Carstairs quintile (COA-level), individual-level ethnicity, gestational age as linear and quadratic terms, season of birth, year (linear term), random intercept for MSOA and daytime noise ( $L_{Aeq,16hr}$ ). Total N = 540,365, with 13,804 cases of term LBW. Term SGA models adjusted for: maternal age, birth registration type, tobacco expenditure (COA-level), Carstairs quintile (COA-level), season of birth, year (linear term) and random intercept for MSOA. Total N = 471,489, with 44,966 cases of term SGA.

**Supplementary Table 11: Joint air-pollutant-noise models: Adjusted mean difference (95% CI) in birth weight (g) associated with air pollutants (per IQR) and noise amongst term births**

| Exposure                                              | White  |                                     |         | Asian |                                     |         | Black |                                     |         |
|-------------------------------------------------------|--------|-------------------------------------|---------|-------|-------------------------------------|---------|-------|-------------------------------------|---------|
|                                                       | N      | Term birth weight (g)<br>MD (95%CI) | p-value | N     | Term birth weight (g)<br>MD (95%CI) | p-value | N     | Term birth weight (g)<br>MD (95%CI) | p-value |
| <b>NO<sub>2</sub> (per IQR)</b>                       | 286192 | -13.02 (-15.91, -10.12)             |         | 93555 | -5.74 (-11.17, -0.32)               |         | 91740 | -10.84 (-15.90, -5.78)              |         |
| <b>NO<sub>x</sub> (per IQR)</b>                       | 286192 | -13.31 (-16.22, -10.40)             |         | 93555 | -4.63 (-10.00, 0.73)                |         | 91740 | -10.01 (-14.96, -5.06)              |         |
| <b>PM<sub>2.5</sub> traffic-exhaust (per IQR)</b>     | 286192 | -15.60 (-18.83, -12.37)             |         | 93555 | -10.06 (-15.74, -4.39)              |         | 91740 | -8.89 (-14.27, -3.51)               |         |
| <b>PM<sub>2.5</sub> traffic-non-exhaust (per IQR)</b> | 286192 | -9.93 (-12.48, -7.38)               |         | 93555 | -2.65 (-7.05, 1.75)                 |         | 91740 | -6.76 (-11.03, -2.49)               |         |
| <b>PM<sub>2.5</sub> (per IQR)</b>                     | 286192 | -14.66 (-19.64, -9.68)              |         | 93555 | -6.51 (-15.17, 2.14)                |         | 91740 | -13.33 (-21.90, -4.77)              |         |
| <b>PM<sub>10</sub> (per IQR)</b>                      | 286192 | -8.44 (-12.22, -4.65)               |         | 93555 | -2.08 (-8.60, 4.44)                 |         | 91740 | -5.57 (-12.11, 0.96)                |         |
| <b>O<sub>3</sub> (per IQR)</b>                        | 286192 | 5.31 (2.58, 8.05)                   |         | 93555 | 5.20 (0.40, 10.01)                  |         | 91740 | 5.60 (0.66, 10.55)                  |         |
| <b>Adjusted for NO<sub>2</sub></b>                    |        |                                     |         |       |                                     |         |       |                                     |         |
| <b>Day-time noise, L<sub>Aeq,16hr</sub></b>           |        |                                     |         |       |                                     |         |       |                                     |         |
| <55dB                                                 | 87807  | Reference                           |         | 25713 | Reference                           |         | 25181 | Reference                           |         |
| 55-<60 dB                                             | 140525 | 1.41 (-2.32, 5.15)                  |         | 46700 | 10.96 (4.38, 17.55)                 |         | 45126 | 6.59 (-0.20, 13.38)                 |         |
| 60-<65 dB                                             | 20879  | -4.18 (-10.69, 2.34)                |         | 7120  | 9.49 (-1.67, 20.65)                 |         | 7335  | -2.68 (-14.07, 8.72)                |         |
| ≥65dB                                                 | 36981  | -1.08 (-6.69, 4.53)                 |         | 14022 | 6.06 (-3.33, 15.45)                 |         | 14098 | 6.72 (-2.91, 16.35)                 |         |
| p for trend                                           | 286192 |                                     | 0.442   | 93555 |                                     | 0.212   | 91740 |                                     | 0.364   |
| <b>Night-time noise, L<sub>night</sub></b>            |        |                                     |         |       |                                     |         |       |                                     |         |
| <50dB                                                 | 90922  | Reference                           |         | 26617 | Reference                           |         | 25343 | Reference                           |         |
| 50-<55 dB                                             | 135636 | -0.49 (-4.23, 3.25)                 |         | 45157 | 8.47 (1.90, 15.05)                  |         | 44076 | 4.69 (-2.13, 11.51)                 |         |
| 55-<60 dB                                             | 20705  | -5.56 (-12.08, 0.97)                |         | 7064  | 9.40 (-1.75, 20.56)                 |         | 7193  | 0.57 (-10.91, 12.04)                |         |
| 60-<65 dB                                             | 23121  | -1.77 (-8.10, 4.56)                 |         | 8717  | 9.15 (-1.30, 19.59)                 |         | 8499  | 2.29 (-8.62, 13.20)                 |         |
| ≥65dB                                                 | 15808  | -6.31 (-14.20, 1.58)                |         | 6000  | -9.37 (-22.41, 3.68)                |         | 6629  | 5.48 (-7.37, 18.33)                 |         |
| p for trend                                           | 286192 |                                     | 0.090   | 93555 |                                     | 0.994   | 91740 |                                     | 0.581   |

Models are adjusted as follows: sex, maternal age, birth registration type, tobacco expenditure (COA-level), Carstairs quintile (COA-level), individual-level ethnicity, gestational age as linear and quadratic terms, season of birth, year (linear term) and random intercept for MSOA. All air pollution estimates are adjusted for daytime noise (L<sub>Aeq,16hr</sub>), and noise estimates are adjusted for traffic-related air pollution exposure (NO<sub>2</sub>). IQR values for air pollutants: NO<sub>2</sub> (per IQR, 8.6 µg/m<sup>3</sup>), NO<sub>x</sub> (per IQR, 23.7 µg/m<sup>3</sup>), PM<sub>2.5</sub> traffic exhaust (per IQR, 0.35 µg/m<sup>3</sup>), PM<sub>2.5</sub> traffic non-exhaust (per IQR, 0.29 µg/m<sup>3</sup>), PM<sub>2.5</sub> (per IQR, 2.2 µg/m<sup>3</sup>), PM<sub>10</sub> (per IQR, 3.0 µg/m<sup>3</sup>), O<sub>3</sub> (per IQR, 8.4 µg/m<sup>3</sup>)

## Supplementary Appendix 1 - Adjusted joint-exposure generalised additive models (GAMs)

The plots below show smoothing functions with 95% confidence intervals for the association between term birth weight and night-time noise ( $L_{\text{night}}$ ) and air pollutants, in joint-exposure models.

$L_{\text{night}}$  is night-time noise. All models are adjusted for sex, maternal age, birth registration type, tobacco expenditure (COA-level), Carstairs quintile (COA-level), individual-level ethnicity, gestational age as linear and quadratic terms, season of birth, and year, in addition to including the air pollutant and/or noise metrics listed.

### Model 1: $\text{NO}_x$ and $L_{\text{night}}$

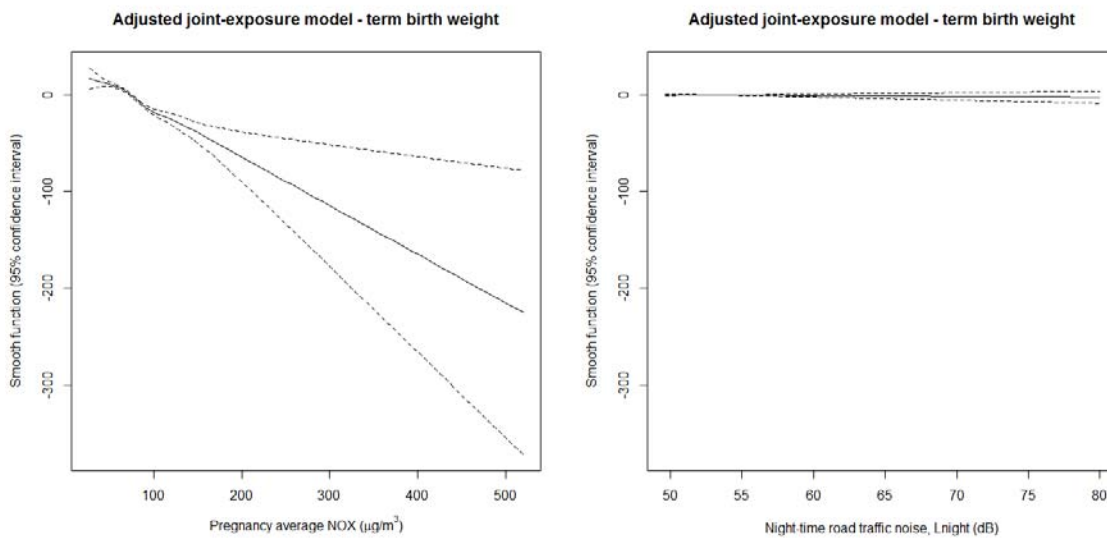

### Model 3: $\text{PM}_{2.5}$ traffic-exhaust and $L_{\text{night}}$

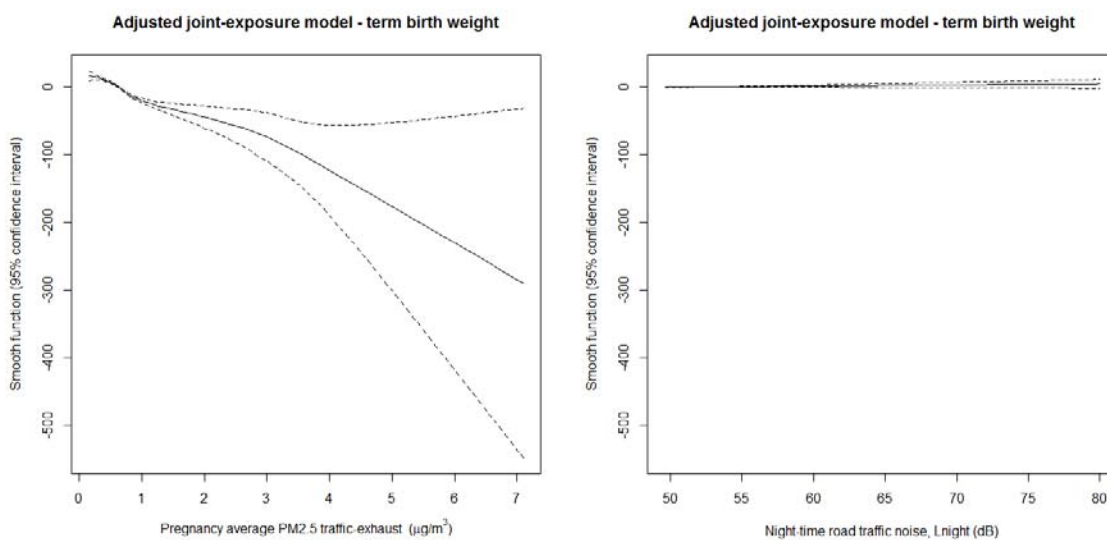

### Model 4: PM<sub>2.5</sub> traffic-non-exhaust and L<sub>night</sub>

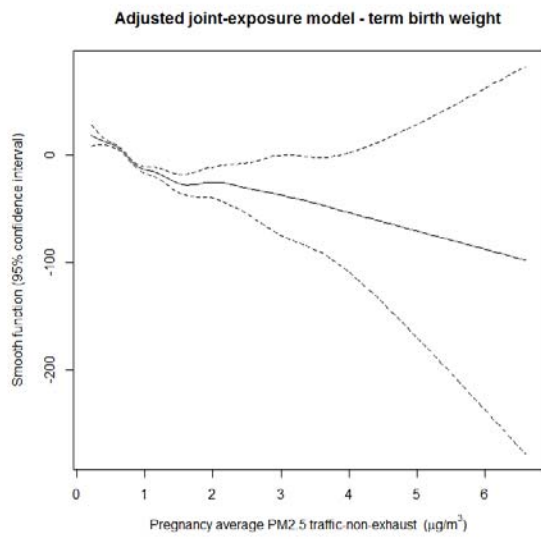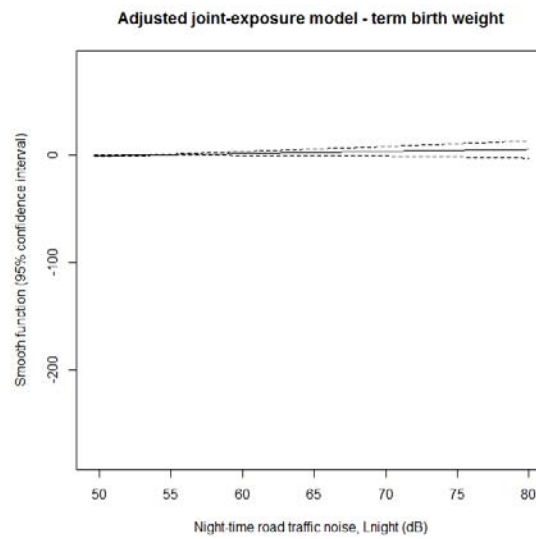

### Model 5: PM<sub>2.5</sub> and L<sub>night</sub>

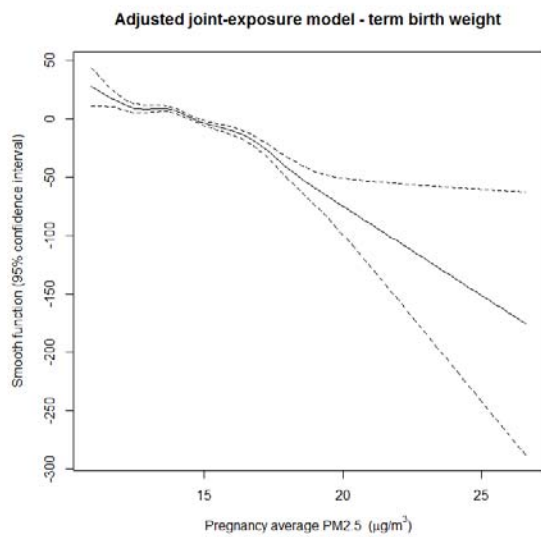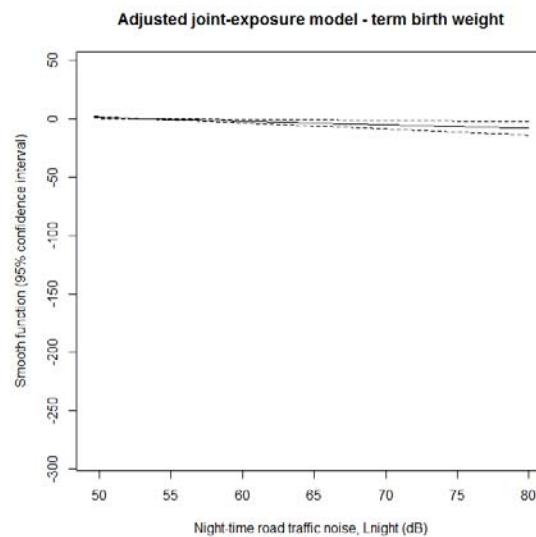

## Model 6: PM<sub>10</sub> and L<sub>night</sub>

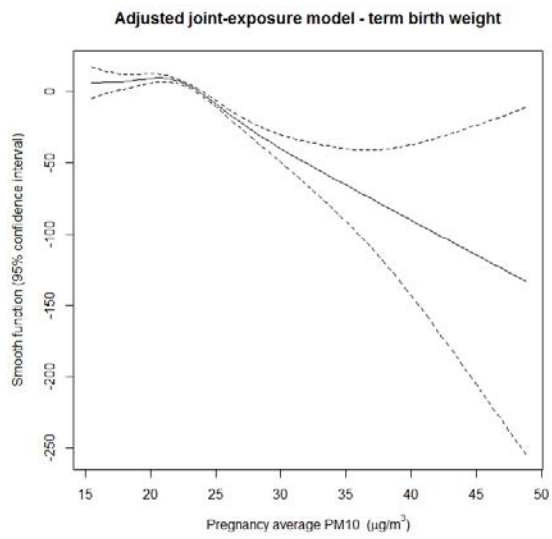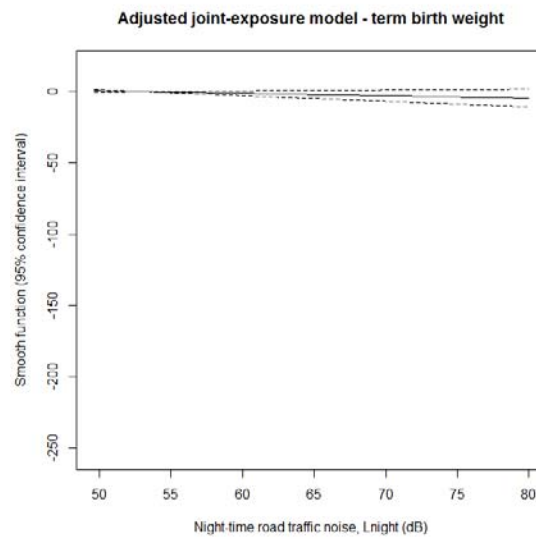

## Model 7: O<sub>3</sub> and L<sub>night</sub>

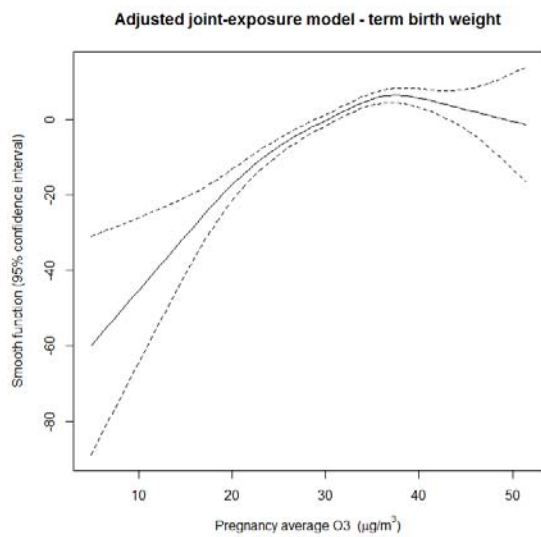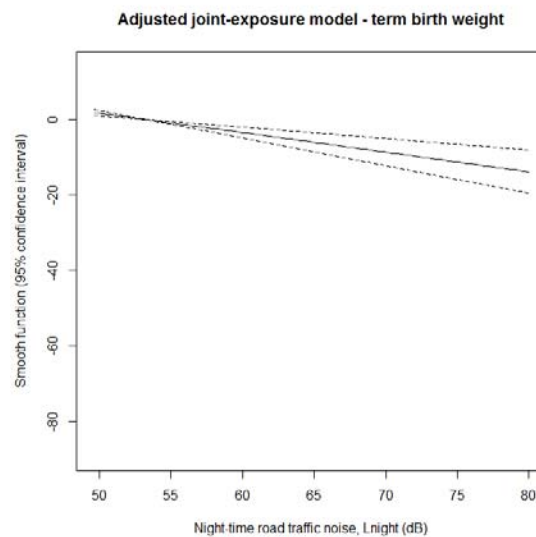

Supplement: smir039236.ww1.pdf [file smir039236.ww1.pdf]
